# 1 **An Indexing Theory for Working Memory based on Fast Hebbian** 2 **Plasticity**

3 Abbreviated Title: Fast Hebbian Indexing Theory for WM

4 Authors: Florian Fiebig<sup>1</sup>, Pawel Herman<sup>1</sup>, and Anders Lansner<sup>1,2,\*</sup>

5 1. Lansner Laboratory, Department of Computational Science and Technology, Royal Institute of Technology,  
6 10044 Stockholm, Sweden,

7 2. Department of Mathematics, Stockholm University, 10691 Stockholm, Sweden

8 \* Corresponding Author: Anders Lansner, Department of Computational Science and Technology, Royal Institute  
9 of Technology (KTH), Stockholm, Lindstedtsvägen 24, 100 44, Sweden. Email: ala@kth.se

10 Number of pages: 31

11 Number of figures: 9 (+ 7 Supplements)

12 Number of Tables: 3

13 Number of words, Abstract: 148 (<=150 for eLife)

14 Number of words, introduction: 903

15 Number of words, Results: 1996 (excluding legends)

16 Number of words, Discussion + Conclusion (excluding legends): 2354

## 17 Acknowledgements

18 This work was supported by the EuroSPIN Erasmus Mundus doctoral program, SeRC (Swedish e-  
19 science Research Center), and StratNeuro (Strategic Area Neuroscience at Karolinska Institutet, Umeå  
20 University and KTH Royal Institute of Technology). The simulations were performed using computing  
21 resources provided by the Swedish National Infrastructure for Computing (SNIC) at PDC Centre for  
22 High Performance Computing. We are grateful for helpful comments and suggestions from Drs  
23 Jeanette Hellgren Kotaleski, and Arvind Kumar.

## 24 Competing Interests

25 The authors have no competing interests, financial or otherwise.

## 26 Abstract

27 Working memory (WM) is a key component of human memory and cognition. Computational models  
28 have been used to study the underlying neural mechanisms, but neglected the important role of  
29 short- and long-term memory interactions (STM, LTM) for WM. Here, we investigate these using a  
30 novel multi-area spiking neural network model of prefrontal cortex (PFC) and two parieto-temporal  
31 cortical areas based on macaque data. We propose a WM indexing theory that explains how PFC  
32 could associate, maintain and update multi-modal LTM representations. Our simulations  
33 demonstrate how simultaneous, brief multi-modal memory cues could build a temporary joint  
34 memory representation as an “index” in PFC by means of fast Hebbian synaptic plasticity. This index  
35 can then reactivate spontaneously and thereby reactivate the associated LTM representations.  
36 Cueing one LTM item rapidly pattern-completes the associated un-cued item via PFC. The PFC-STM  
37 network updates flexibly as new stimuli arrive thereby gradually over-writing older representations.

## 38 Introduction

39 By working memory (WM), we typically understand a flexible but volatile kind of memory capable of  
40 holding a small number of items over short time spans, allowing us to act beyond the immediate here  
41 and now. WM is thus a key component in cognition and is often affected early on in neurological and  
42 psychiatric conditions, e.g. Alzheimer’s disease and schizophrenia (Slifstein et al. 2015). Prefrontal  
43 cortex (PFC) has consistently been implicated as a key neural substrate for WM in humans and non-  
44 human primates (Fuster 2009; D’Esposito & Postle 2015).

45 Computational models of WM have so far focused mainly on its short-term memory aspects,  
46 explained either by means of persistent activity (Funahashi et al. 1989; Goldman-Rakic 1995; Camperi  
47 & Wang 1998; Compte et al. 2000) or more recently fast synaptic plasticity (Mongillo et al. 2008;  
48 Fiebig & Lansner 2017; Lundqvist et al. 2011) as the underlying neural mechanism. The nature of  
49 neural mechanisms involved in WM processes in PFC and, consequently, their neural manifestations  
50 have strong implications for the dynamic interaction between short- and long-term memory (STM,  
51 LTM). Although this operational STM-LTM coupling has been often missing in computational and  
52 empirical studies, it is critical to WM function as it enables to activate or “bring online” a small set of  
53 WM task relevant LTM representations (Eriksson et al. 2015). This prominent effect is envisaged to  
54 underlie complex cognitive phenomena, which have been characterized extensively in experiments  
55 on humans as well as animals. Nevertheless, the neural mechanisms involved remain elusive.

56 Here we present a large-scale spiking neural network model of WM and focus on investigating the  
57 neural mechanisms behind the fundamental STM-LTM interactions critical to WM function. In this  
58 context, we introduce a WM indexing theory, inspired by the predecessor hippocampal memory  
59 indexing theory (Teyler & DiScenna 1986) originally proposed to account for the role of hippocampus  
60 in storing episodic memories (Teyler & Rudy 2007). Notably, Teyler and Rudy (2007) emphasized the  
61 role of rapid hippocampal synaptic plasticity for indexing to work. We propose that Hebbian plasticity  
62 in PFC could be even faster and serve as a key mechanism in synaptic WM. The phenomena of  
63 binding and indexing of neural representations have been a common recurring theme in memory  
64 research, in particular in relation to the role of hippocampus and surrounding structures (Teyler &  
65 Rudy 2007; Squire 1992; O’Reilly & Frank 2006). Our main novel contribution here is to show that a  
66 neurobiologically constrained large-scale spiking neural network model of interacting cortical areas  
67 can function as a robust WM, including its important role of bringing relevant LTM representations  
68 temporarily on-line by means of “indexing”. In addition, the model replicates many experimentally  
69 observed phenomena in terms of oscillations, coherence and latency within and between cortical  
70 regions.

71 The core idea of our theory rests on the concept of cell assemblies formed in the PFC by means of  
72 fast Hebbian plasticity that serve as “indices” linking LTM representations. Our model comprises a  
73 subsampled PFC network model of STM that is reciprocally connected with two LTM component  
74 networks representing different sensory modalities (e.g. visual and auditory) in temporal cortical  
75 areas. This new model builds on and extends our recent PFC-dependent STM model of human word-  
76 list learning (Fiebig & Lansner 2017), shown to reproduce a range of patterns of mesoscopic neural  
77 activity observed in WM experiments, and it employs the same fast Hebbian plasticity as a key neural  
78 mechanism, intrinsically within PFC but also in PFC backprojections that target parieto-temporal LTM  
79 stores. This novel concept, at the heart of our WM indexing theory, has strong implications for WM  
80 function and results in large-scale inter-network dynamics as a neural correlate of WM phenomena,  
81 which offers macroscopic predictions for experimental validation. Plasticity in this functional context  
82 needs to be Hebbian, i.e. associative, and has to be induced and expressed on a time-scale of a few  
83 hundred milliseconds. Recent experiments have demonstrated the existence of fast forms of Hebbian  
84 synaptic plasticity, e.g. short-term potentiation (STP, or Labile LTP) (Erickson et al. 2010; Park et al.  
85 2014; Kauer et al. 2018), which lends credibility to this type of WM mechanism.

86 We hypothesize that activity in parieto-temporal LTM stores targeting PFC via fixed patchy synaptic  
87 connections triggers an activity pattern in PFC, which is rapidly connected by means of fast Hebbian  
88 plasticity to form a cell assembly displaying attractor dynamics. The connections in backprojections  
89 from PFC to the same LTM stores are also enhanced and provide a functional link specifically with the  
90 triggering cell assemblies there. Our simulations demonstrate that such a composite WM model can  
91 function as a robust and flexible multi-item and cross-modal WM that maintains a small set of  
92 activated task relevant LTM representations and associations. Transiently formed cell assemblies in  
93 PFC serve the role of indexing and temporary binding of these LTM representations, hence giving rise  
94 to the name of the proposed theory. The PFC cell assemblies can activate spontaneously and thereby  
95 reactivate the associated long-term representations. Cueing one LTM item rapidly activates the  
96 associated un-cued item via PFC by means of pattern completion. The STM network flexibly updates  
97 WM content as new stimuli arrive whereby older representations gradually fade away. Interestingly,  
98 this model implementing the WM indexing theory can also explain the so far poorly understood  
99 cognitive phenomenon of variable binding or object – name association, which is one key ingredient  
100 in human reasoning and planning (Cer & O’Reily 2012; van der Velde & de Kamps 2015; Pinkas et al.  
101 2013).

## 102 **Materials & Methods**

### 103 **Neuron Model**

104 We use an integrate-and-fire point neuron model with spike-frequency adaptation (Brette &  
105 Gerstner 2005) which was modified (Tully et al. 2014) for compatibility with a custom-made BCPNN  
106 synapse model in NEST (see *Simulation Environment*) through the addition of the intrinsic excitability  
107 current  $I_{\beta_j}$ . The model was simplified by excluding the subthreshold adaptation dynamics. Membrane  
108 potential  $V_m$  and adaptation current are described by the following equations:

$$109 \quad C_m \frac{dV_m}{dt} = -g_L(V_m - E_L) + g_L \Delta_T e^{\frac{V_m - V_t}{\Delta_T}} - I_w(t) - I_{tot}(t) + I_{\beta_j} + I_{ext} \quad (1)$$

$$110 \quad \frac{dI_w(t)}{dt} = \frac{-I_w(t)}{\tau_{I_w}} + b\delta(t - t_{sp}) \quad (2)$$

111 The membrane voltage changes through incoming currents over the membrane capacitance  $C_m$ . A  
112 leak reversal potential  $E_L$  drives a leak current through the conductance  $g_L$ , and an upstroke slope  
113 factor  $\Delta_T$  determines the sharpness of the spike threshold  $V_t$ . Spikes are followed by a reset of  
114 membrane potential to  $V_r$ . Each spike increments the adaptation current by  $b$ , which decays with

115 time constant  $\tau_{I_w}$ . Simulated basket cells feature neither the intrinsic excitability current  $I_{\beta_j}$  nor this  
116 spike-triggered adaptation.

117 Besides external input  $I_{ext}$  (*Stimulation Protocol*) neurons receive a number of different synaptic  
118 currents from its presynaptic neurons in the network (AMPA, NMDA and GABA), which are summed  
119 at the membrane accordingly:

$$120 \quad I_{tot_j}(t) = \sum_{syn} \sum_i g_{ij}^{syn}(t) (V_{m_j} - E_{ij}^{syn}) = I_j^{AMPA}(t) + I_j^{NMDA}(t) + I_j^{GABA}(t) \quad (3)$$

## 121 Synapse Model

122 Excitatory AMPA and NMDA synapses have a reversal potential  $E^{AMPA} = E^{NMDA}$ , while inhibitory  
123 synapses drive the membrane potential toward  $E^{GABA}$ . Every presynaptic input spike (at  $t_{sp}^i$  with  
124 transmission delay  $t_{ij}$ ) evokes a transient synaptic current through a change in synaptic conductance  
125 that follows an exponential decay with time constants  $\tau^{syn}$  depending on the synapse type  
126 ( $\tau^{AMPA} \ll \tau^{NMDA}$ ).

$$127 \quad g_{ij}^{syn}(t) = x_{ij}^{dep}(t) w_{ij}^{syn} e^{-\frac{t-t_{sp}^i-t_{ij}}{\tau^{syn}}} H(t - t_{sp}^i - t_{ij}) \quad (4)$$

128  $H(\cdot)$  is the Heaviside step function.  $w_{ij}^{syn}$  is the peak amplitude of the conductance transient, learned  
129 by the *Spike-based BCPNN Learning Rule* (next Section). Plastic synapses are also subject to synaptic  
130 depression (vesicle depletion) according to the Tsodyks-Markram formalism (Tsodyks & Markram  
131 1997), modeling the transmission-dependent depletion of available synaptic resources  $x_{ij}^{dep}$  by a  
132 utilization factor  $U$ , and a depression/reuptake time constant  $\tau_{rec}$ :

$$133 \quad \frac{dx_{ij}^{dep}}{dt} = \frac{1-x_{ij}^{dep}}{\tau_{rec}} - U x_{ij}^{dep} \sum_{sp} \delta(t - t_{sp}^i - t_{ij}) \quad (5)$$

## 134 Spike-based BCPNN Learning Rule

135 Plastic AMPA and NMDA synapses are modeled to mimic short-term potentiation (STP) (Erickson et  
136 al. 2010) with a spike-based version of the Bayesian Confidence Propagation Neural Network  
137 (BCPNN) learning rule (Wahlgren & Lansner 2001; Tully et al. 2014). For a full derivation from Bayes  
138 rule, deeper biological motivation, and proof of concept, see Tully et al. (2014) and the earlier STM  
139 model implementation (Fiebig & Lansner 2017).

140 Briefly, the BCPNN learning rule makes use of biophysically plausible local traces to estimate  
141 normalized pre- and post-synaptic firing rates, as well as co-activation, which can be combined to  
142 implement Bayesian inference because connection strengths and neural unit activations have a  
143 statistical interpretation (Sandberg et al. 2002; Fiebig & Lansner 2014; Tully et al. 2014). Crucial  
144 parameters include the synaptic activation trace  $Z$ , which is computed from spike trains via pre- and  
145 post-synaptic time constants  $\tau_{z_i}^{syn}, \tau_{z_j}^{syn}$ , which are the same here but differ between AMPA and  
146 NMDA synapses:

$$147 \quad \tau_{z_i}^{AMPA} = \tau_{z_j}^{AMPA} = 5ms, \quad \tau_{z_i}^{NMDA} = \tau_{z_j}^{NMDA} = 100ms \quad (6)$$

148 The larger NMDA time constant reflects the slower closing dynamics of NMDA-receptor gated  
149 channels. All excitatory connections are drawn as AMPA and NMDA pairs, such that they feature both  
150 components. Further filtering of the  $Z$  traces leads to rapidly expressing memory traces (referred to  
151 as P-traces) that estimate activation and coactivation:

$$152 \quad \tau_p \frac{dP_i}{dt} = \kappa(Z_i - P_i), \quad \tau_p \frac{dP_j}{dt} = \kappa(Z_j - P_j), \quad \tau_p \frac{dP_{ij}}{dt} = \kappa(Z_i Z_j - P_{ij}) \quad (7)$$

153 These traces constitute memory itself and decay in a palimpsest fashion. STP decay is known to take  
 154 place on timescales that are highly variable and activity dependent (Volianskis et al. 2015); see  
 155 Discussion – The case for Hebbian plasticity.

156 We make use of the learning rule parameter  $\kappa$  (**Equation 7**), which may reflect the action of  
 157 endogenous neuromodulators, e.g. dopamine acting on D1 receptors that signal relevance and thus  
 158 modulate learning efficacy. It can be dynamically modulated to switch off learning to fixate the  
 159 network, or temporarily increase plasticity ( $\kappa_p, \kappa_{normal}$ , **Table 1**). In particular, we trigger a transient  
 160 increase of plasticity concurrent with external stimulation.

161 Tully et al. (2014) showed that Bayesian inference can be recast and implemented in a network using  
 162 the spike-based BCPNN learning rule. Prior activation levels are realized as an intrinsic excitability of  
 163 each postsynaptic neuron, which is derived from the post-synaptic firing rate estimate  $p_j$  and  
 164 implemented in the NEST neural simulator (Gewaltig & Diesmann 2007) as an individual neural  
 165 current  $I_{\beta_j}$  with scaling constant  $\beta_{gain}$

$$166 \quad I_{\beta_j} = \beta_{gain} \log(P_j) \quad (8)$$

167  $I_{\beta_j}$  is thus an activity-dependent intrinsic membrane current to the neurons, similar to the A-type  
 168 potassium channel (Hoffman et al. 1997) or TRP channel (Petersson et al. 2011). Synaptic weights are  
 169 modeled as peak amplitudes of the conductance transient (**Equation 4**) and determined from the  
 170 logarithmic BCPNN weight, as derived from the P-traces with a synaptic scaling constant  $w_{gain}^{syn}$ .

$$171 \quad w_{ij}^{syn} = w_{gain}^{syn} \log \frac{P_{ij}}{P_i P_j} \quad (9)$$

172 In our model, AMPA and NMDA synapses make use of  $w_{gain}^{AMPA}$  and  $w_{gain}^{NMDA}$  respectively. The  
 173 logarithm in **Equations 8,9** is motivated by the Bayesian underpinnings of the learning rule, and  
 174 means that synaptic weights  $w_{ij}^{syn}$  multiplex both the learning of excitatory and di-synaptic inhibitory  
 175 interaction. The positive weight component is here interpreted as the conductance of a  
 176 monosynaptic excitatory pyramidal to pyramidal synapse (**Figure 1**, plastic connection to the co-  
 177 activated MC), while the negative component (**Figure 1**, plastic connection to the competing MC) is  
 178 interpreted as di-synaptic via a dendritic targeting and vertically projecting inhibitory interneuron like  
 179 a double bouquet and/or bipolar cell (Tucker 2002; Ren et al. 2007; Silberberg & Markram 2007;  
 180 Kapfer et al. 2007). Accordingly, BCPNN connections with a negative weight use a GABAergic reversal  
 181 potential instead, as in previously published models (Tully et al. 2016; Tully et al. 2014; Fiebig &  
 182 Lansner 2017). Model networks with negative synaptic weights have been shown to be functionally  
 183 equivalent to ones with both excitatory and inhibitory neurons with only positive weights (Parisien et  
 184 al. 2008).

185 Code for the NEST implementation of the BCPNN synapse is openly available (see *Simulation*  
 186 *Environment*).

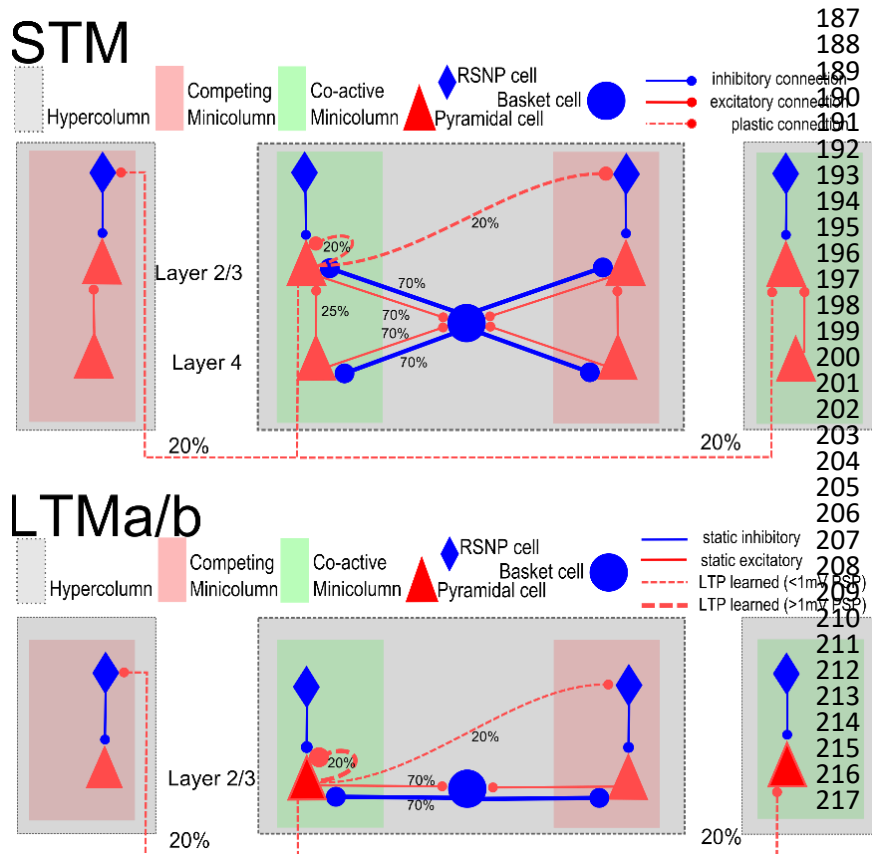

**Figure 1. Local columnar connectivity within STM and LTM.**

Connection probabilities are given by the percentages, further details in Tables 1-3. The strength of plastic connections develops according to the synaptic learning rule described in *Spike-based BCPNN Learning Rule*. Initial weights are low and distributed by a noise-based initialization procedure (*Stimulation protocol*). LTM however, dashed connections are not plastic in LTM (besides the STD of Equation 4), but already encode memory patterns previously learned through an LTP protocol, and loaded before the simulation using receptor-specific weights found in Table 2.

## 218 Axonal Conduction Delays

219 We compute axonal delays  $t_{ij}$  between presynaptic neuron  $i$  and postsynaptic neuron  $j$ , based on a  
 220 constant conduction velocity  $V$  and the Euclidean distance between respective columns. Conduction  
 221 delays were randomly drawn from a normal distribution with mean according to the connection  
 222 distance divided by conduction speed and with a relative standard deviation of 15% of the mean in  
 223 order to account for individual arborization differences. Further, we add a minimal conduction delay  
 224  $t_{min}^{syn}$  of 1.5 ms to reflect not directly modeled delays, such as diffusion of transmitter over the synaptic  
 225 cleft, dendritic branching, thickness of the cortical sheet, and the spatial extent of columns:

$$226 \quad \overline{t_{ij}} = \frac{\sqrt{(x_i - x_j)^2 + (y_i - y_j)^2}}{V} + t_{min}^{syn} \text{ ms} \quad t_{ij} \sim N(\overline{t_{ij}}, .15\overline{t_{ij}}) \quad (10)$$

## 227 STM Network Architecture

228 The model organizes cells in the three simulated cortical areas into grids of nested hypercolumns  
 229 (HCs) and minicolumns (MCs), sometimes referred to as macro columns, and “functional columns”  
 230 respectively. The STM network is simulated with  $n_{HC}^{STM} = 25$  HCs spread out on a grid with spatial  
 231 extent of 17x17 mm. This spatially distributed network of columns has sizable conduction delays due  
 232 to the distance between columns and can be interpreted as a spatially distributed subsampling of  
 233 columns from the extent of dorsolateral PFC (such as BA 46 and 9/46, which also have a combined  
 234 spatial extent of about 289 mm<sup>2</sup> in macaque).

235 Each of the non-overlapping HCs has a diameter of about 640  $\mu\text{m}$ , comparable to estimates of  
 236 cortical column size (Mountcastle 1997), contains 48 basket cells, and its pyramidal cell population  
 237 has been divided into twelve MC’s. This constitutes another sub-sampling from the roughly 100 MC  
 238 per HC when mapping the model to biological cortex. We simulate 20 pyramidal neurons per MC to  
 239 represent roughly the layer 2 population of an MC, 5 cells for layer 3A, 5 cells for layer 3B, and



240 another 30 pyramidal cells for layer 4, as macaque BA 46 and 9/46 have a well-developed granular  
 241 layer (Petrides & Pandya 1999). The STM model thus contains about 18,000 simulated pyramidal cells  
 242 in four layers (although layers 2, 3A, and 3B are often treated as one layer 2/3).

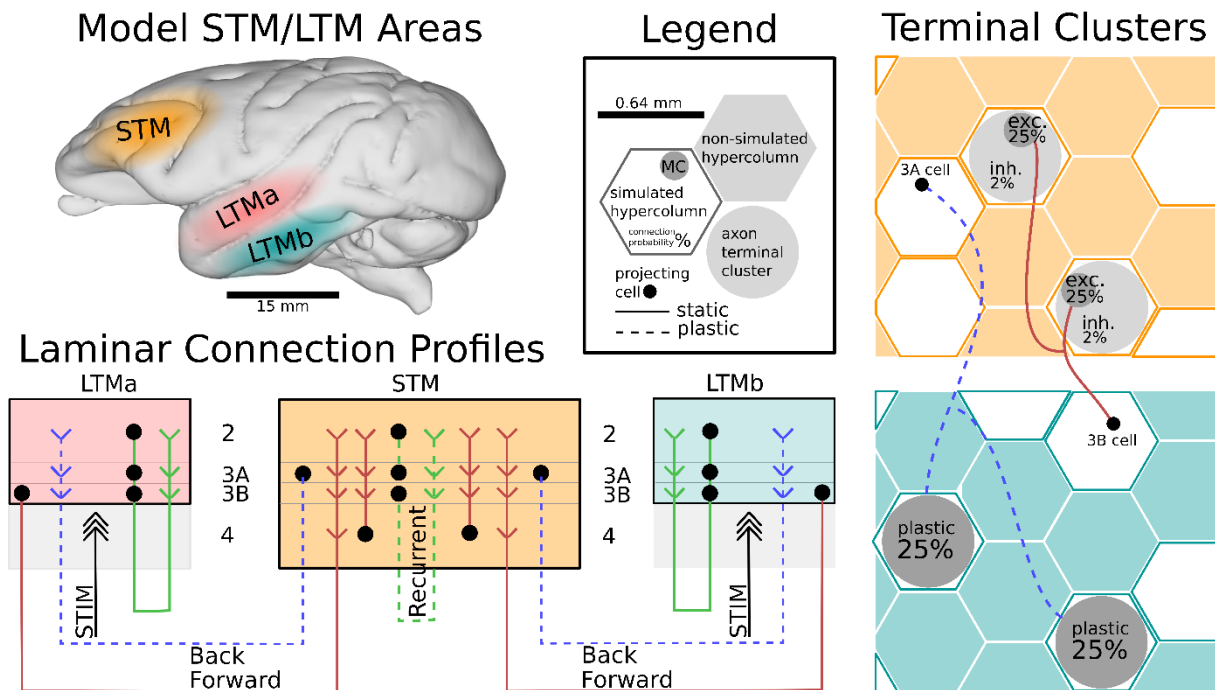

243 **Figure 2. Schematic of modeled connectivity within and across representative STM and LTM areas in macaque.** STM features 25  
 244 hypercolumns (HC), whereas LTMa and LTMb both contain 16 simulated HCs. Each network spans several hundred mm<sup>2</sup> and the simulated  
 245 columns constitute a spatially distributed subsample of biological cortex, defined by conduction delays. Pyramidal cells in the simulated  
 246 supragranular layers form connections both within and across columns. STM features an input layer 4 that shapes the input response of  
 247 cortical columns, whereas LTM is instead stimulated directly to cue the activation of previously learned long-term memories. Additional  
 248 corticocortical connections (feedforward in brown, feedback in dashed blue) are sparse (<1% connection probability) and implemented  
 249 with terminal clusters (rightmost panels) and specific laminar connection profiles (bottom left). The connection schematic illustrates  
 250 laminar connections realizing a direct supragranular forward-projection, as well as a common supragranular backprojection. Layer 2/3  
 251 recurrent connections in STM (dashed green) and corticocortical backprojections (dashed blue) feature fast Hebbian plasticity. For an in-  
 252 depth model description, including the columnar microcircuits, please refer to *Methods* and **Figure 1**.  
 253

## 254 STM Network Connectivity

255 The most relevant connectivity parameters are found in **Tables 1-3**. Pyramidal cells project laterally  
 256 to basket cells within their own HC via AMPA-mediated excitatory projections with a connection  
 257 probability of  $p_{P-B}$ , i.e. connections are randomly drawn without duplicates until the target fraction  
 258 of all possible pre-post connections exist. In turn, they receive GABAergic feedback inhibition from  
 259 basket cells ( $p_{B-P}$ ) that connect via static inhibitory synapses rather than plastic BCPNN synapses.  
 260 This strong loop implements a competitive soft-WTA subnetwork within each HC (Douglas & Martin  
 261 2004). Local basket cells fire in rapid bursts, and induce alpha/beta oscillations in the absence of  
 262 attractor activity and gamma, when attractors are present and active.

263 Pyramidal cells in layer 2/3 form connections both within and across HCs at connection probability  
 264  $p_{L23e-L23e}$ . These projections are implemented with plastic synapses and contain both AMPA and  
 265 NMDA components, as explained in subsection *Spike-based BCPNN Learning Rule*. Connections  
 266 across columns and areas may feature sizable conduction delays due to the implied spatial distance  
 267 between them (**Table 1**)

268 Pyramidal cells in layer 4 project to pyramidal cells of layer 2/3, targeting 25% of cells within their  
 269 respective MC only. Experimental characterization of excitatory connections from layer 4 to layer 2/3  
 270 pyramidal cells have confirmed similarly high fine-scale specificity in rodent cortex (Yoshimura &  
 271 Callaway 2005) and in-turn, full-scale cortical simulation models without functional columns have

272 found it necessary to specifically strengthen these connections to achieve defensible firing rates  
273 (Potjans & Diesmann 2014).

274 In summary, the STM model thus features a total of 16.2 million plastic AMPA- and NMDA-mediated  
275 connections between its 18,000 simulated pyramidal cells, as well as 67,500 static connections from  
276 9,000 layer 4 pyramidal cells to layer 2/3 targets within their respective MC, and 1.2 million static  
277 connections to and from 1,200 simulated basket cells.

## 278 LTM network

279 We simulate two structurally identical LTM networks, referred to as LTMa, and LTMb. LTM networks  
280 may be interpreted as a spatially distributed subsampling of columns from areas of the parieto-  
281 temporal cortex commonly associated with modal LTM stores. For example Inferior Temporal Cortex  
282 (ITC) is often referred to as the storehouse of visual LTM (Miyashita 1993). Two such LTM areas are  
283 indicated in **Figure 2**.

284 We simulate  $n_{\text{HC}}^{\text{LTM}} = 16$  HCs in each area and nine MC per HC (further details in **Tables 1-3**). Both  
285 LTM networks are structurally very similar to the previously described STM, yet they do not feature  
286 plasticity among their own cells, beyond short-term dynamics in the form of synaptic depression.  
287 Unlike STM, LTM areas also do not feature an input layer 4, but are instead stimulated directly to cue  
288 the activation of previously learned long-term memories (*Stimulation Protocol*). Various previous  
289 models with identical architecture have demonstrated how attractors can be learned via plastic  
290 BCPNN synapses (Tully et al. 2016; Lansner et al. 2013; Tully et al. 2014; Fiebig & Lansner 2017). We  
291 load each LTM network with nine orthogonal attractors (ten in the example of **Figure 4B**, which  
292 features two sets of five memories each). Each memory pattern consists of 16 active MCs, distributed  
293 across the 16 HCs of the network. We load-in BCPNN weights from a previously trained network  
294 (**Table 2**), but thereafter set  $\kappa = 0$  to deactivate plasticity of recurrent connections in LTM stores.

295 In summary, the two LTM models thus feature a total of 7.46 million connections between 8.640  
296 pyramidal cells, as well as 435.456 static connections to and from 1152 basket cells.

## 297 Inter-area Connectivity

298 In our model, as in previous work, we focus on layers 2/3, as their high degree of recurrent  
299 connectivity (Thomson 2002; Yoshimura & Callaway 2005) supports attractor function. The high fine-  
300 scale specificity of dense stellate cell (Yoshimura et al. 2005) and double-bouquet cell inputs  
301 (DeFelipe et al. 2006; Chrysanthis et al. 2018) enable strongly coding sub-populations in the  
302 superior layers of functional columns. This fits with the general observation that layers 2/3 are more  
303 input selective than the lower layers (Sakata & Harris 2009; Crochet & Petersen 2009) and thus of  
304 more immediate concern to our computational model.

305 The recent characterization of supragranular feedforward and feedback projections (from large cells  
306 in layer 3B and 3A, respectively), between association cortices and at short and medium cortical  
307 distances (Markov et al. 2014), allows for the construction of a basic cortical hierarchy without  
308 explicit representation of infragranular layers (and its long-range feedback projections from large  
309 cells in layer 5 and 6). This is not to say that nothing would be gained by explicitly modeling infra-  
310 granular layers, but it would go beyond the scope of this model.

311 Accordingly, our model implements supragranular feedforward and feedback pathways between  
312 cortical areas that are at a medium distance in the cortical hierarchy. The approximate cortical  
313 distance between Inferior Temporal Cortex (ITC) and dlPFC in macaque is about 40 mm and with an  
314 axonal conduction speed of 2 m/s, distributed conduction delays in our model (**Equation 10**)  
315 average just above 20 ms between these areas (Girard et al. 2001; Thorpe & Fabre-Thorpe 2001;  
316 Caminiti et al. 2013).



317 In the forward path, layer 3B cells in LTM project towards STM (**Figure 2**). We do not draw these  
318 connections one-by-one, but as branching axons targeting 25% of the pyramidal cells in a randomly  
319 chosen MC (the chance of any layer 3B cell to target any MC in STM is only 0.15%). The resulting split  
320 between targets in layer 2/3 and 4 is typical for feedforward connections at medium distances in the  
321 cortical hierarchy (Markov et al. 2014) and has important functional implications for the model (*LTM-*  
322 *to-STM Forward Dynamics*). We also branch off some inhibitory corticocortical connections as  
323 follows: for every excitatory connection within the selected targeted MC, an inhibitory connection is  
324 created from the same pyramidal layer 3B source cell onto a randomly selected cell outside the  
325 targeted MC, but inside the local HC. This way of drawing random forward-projections retains a  
326 degree of functional specificity due to its spatial clustering and yields patchy sparse forward-  
327 projections as observed in the cortex (Houzel et al. 1994; Voges et al. 2010) with a resulting inter-  
328 area connection probability of only 0.0125% (648 axonal projections from L3B cells to STM layers 2/3  
329 and 4 results in ~20k total connections after branching as described above.

330 In the feedback path, we draw sparse plastic connections from layer 3A cells in STM to layer 2/3 cells  
331 in LTM: branching axons target 25% of the pyramidal cells in a randomly chosen HC in LTM,  
332 simulating a degree of axonal branching found in the literature (Zufferey et al. 1999). Using this  
333 method, we obtain biologically plausible sparse and structured feedback projections with an inter-  
334 area connection probability of 0.66%, which – unlike the forward pathway – do not have any built-in  
335 MC-specificity but may develop such through activity-dependent plasticity. More parameters on  
336 corticocortical projections can be found in **Table 3**. On average, each LTM pyramidal cell receives  
337 about 120 corticocortical connections from STM. Because about 5% of STM cells fire together during  
338 memory reactivation (see *Results*), this means that a mere 6 active synapses per target cell are  
339 sufficient for driving (and thus maintaining) LTM activity from STM (there are 96 active synapses from  
340 coactive pyramidal cells in LTM).

341 Notably LTMa and LTMb have no direct pathways connecting them in our model since we assume the  
342 use of previously not associated stimuli in our simulated multi-modal tasks and further, that plasticity  
343 of biological connections between them are likely too slow (LTP timescale) to make a difference in  
344 WM dynamics. This arrangement also guarantees that any binding of long-term memories across  
345 LTM areas must be the result of interaction via STM instead. Overall in our model, corticocortical  
346 connectivity is very sparse, below 1% on a cell-to-cell basis.

### 347 Stimulation Protocol

348 The term  $I_{ext}$  in **Equation 1** subsumes specific and unspecific external inputs. To simulate unspecific  
349 input from non-simulated columns, and other areas, pyramidal cells are continually stimulated with a  
350 zero mean noise background throughout the simulation. In each layer, two independent Poisson  
351 sources generate spikes at rate  $r_{bg}^{layer}$ , and connect onto all pyramidal neurons in that layer, via non-  
352 depressing conductances  $\pm g_{bg}^{layer}$  (**Table 2**). Before each simulation, we distribute the initial values  
353 of all plastic weights in the process of learning induced by 1.5 s low background activity (**Table 2**,  
354  $r_{bg-low}^{L23}$ ). To cue the activation of a specific memory pattern (i.e. attractor), we excite LTM pyramidal  
355 cells belonging to a memory patterns component MC with an additional excitatory Poisson spike  
356 train (rate  $r_{cue}$ , length  $t_{cue}$ , conductance  $g_{cue}$ ). As LTM patterns are strongly encoded in each LTM, a  
357 brief 50 ms stimulus is usually sufficient to activate any given memory.

### 358 Spike Train Analysis and Memory Activity Tracking

359 We track memory activity in time by analyzing the population firing rate of pattern-specific and  
360 network-wide spiking activity usually using an exponential moving average filter time-constant of 20  
361 ms. We do not use an otherwise common low-pass filter with symmetrical window, because we are  
362 particularly interested in characterizing activation onsets and onset delays. As activations are  
363 characterized by sizable gamma-like bursts, a simple threshold detector can extract candidate

364 activation events and decode the activated memory. This is trivial in LTM due to the known nature of  
365 its patterns. In STM we decode the stimulus-specificity of each cell individually by finding the  
366 maximum correlation between input pattern and the untrained STM spiking response in the 320 ms  
367 (which is the stimulation interval during plasticity-modulated stimulation period, shown in e.g. **Figure**  
368 **3D**) following the pattern cue to LTM. Thereafter we can filter the population response of cells in  
369 STM with the same selectivity on that basis to obtain a more robust readout. We validate the  
370 specificity by means of cross-correlations, which reveal that the pattern specific populations are  
371 rather orthogonal according to the covariance matrix (off-diagonal magnitude < 0.1). In all three  
372 networks, we measure onset and offset of pattern activity by thresholding each individual activation  
373 at half of its population peak firing rate. In LTM, we further check pattern completion by analyzing  
374 component MC activation. Whenever targeted stimuli are used, we analyze peri-stimulus activation  
375 traces. When activation onsets are less predictable, such as during free STM-paced maintenance, we  
376 extract activation candidates via a threshold detector trained at the 50<sup>th</sup> percentile of the cumulative  
377 distribution of the population firing rate signal.

### 378 **Synthetic field potentials and spectral analysis**

379 We estimate local field potentials (LFPs) by calculating a temporal derivative of the average low-pass  
380 filtered (with the cut-off frequency at 250 Hz) potential for all pyramidal cells in local populations at  
381 every time step, similarly to the approach adopted by (Ursino & La Cara 2006). Although LFP is more  
382 directly linked to the synaptic activity (Logothetis 2003), the averaged membrane potentials have  
383 been reported to be correlated with LFPs (Okun et al. 2010). In particular, low-pass-filtered  
384 components of synaptic currents reflected in differentiated membrane potentials appear to carry the  
385 portion of the power spectral content of extracellular potentials that is relevant to our key findings  
386 (Lindén et al. 2010). As regards the phase response of estimated extracellular potentials, the delays  
387 of different frequency components are spatially dependent (Lindén et al. 2010). However,  
388 irrespective of the LFP synthesis, phase-related phenomena reported in this study remain  
389 qualitatively unaffected since they hinge on relative rather than absolute phase values.

390 Most spectral analyses have been conducted on the synthesized field potentials with the exception of  
391 population firing rates, shown in Fig. 3B and S1A. Spectral information is extracted with a multi-taper  
392 approach using a family of orthogonal tapers produced by Slepian functions (Slepian 1978; Thomson  
393 1982), with frequency-dependent window lengths corresponding to 5-8 oscillatory cycles and  
394 frequency smoothing corresponding to 0.3-0.4 of the central frequency, which was sampled with the  
395 resolution of 1 Hz (this configuration implies that 2-3 tapers are usually used). To obtain the spectral  
396 density, spectro-temporal content is averaged within a specific time interval.

397 The coherence for a pair of synthesized field potentials at the spatial resolution corresponding to a  
398 hypercolumn was calculated using the multi-taper auto-spectral and cross-spectral estimates. The  
399 complex value of coherence (Carter 1987) was evaluated first based on the spectral components  
400 averaged within 0.5 s windows. Next, its magnitude was extracted to produce the time-windowed  
401 estimate of the coherence amplitude. In addition, phase locking statistics were estimated to examine  
402 synchrony without the interference of amplitude correlations (Lachaux et al. 1999; Palva 2005). In  
403 particular, phase locking value (PLV) between two signals with instantaneous phases  $\Phi_1(t)$  and  $\Phi_2(t)$   
404 was evaluated within a time window of size  $N=0.5$  s as follows:

$$405 \quad \text{PLV} = \frac{1}{N} \left| \sum_{i=1}^N \exp(j(\Phi_1(t_i) - \Phi_2(t_i))) \right|.$$

406 The instantaneous phase of the signals was estimated from their analytic signal representation  
407 obtained using a Hilbert transform. Before the transform was applied the signals were narrow-band  
408 filtered with low time-domain spread finite-impulse response filters (in the forward and reverse  
409 directions to avoid any phase distortions). The analysis was performed mainly for gamma-range

410 oscillations. Continuous PLV estimate was obtained with a sliding window approach, and the average  
 411 along with standard error were calculated typically over 25 trials.

## 412 Simulation Environment and Code Accessibility

413 We use the NEST simulator (Gewaltig & Diesmann 2007) version 2.2 for our simulations, running on a  
 414 Cray XC-40 Supercomputer of the PDC Centre for High Performance Computing. The custom-build  
 415 spiking neural network implementation of the BCPNN learning rule for MPI-parallelized NEST is  
 416 available on github: <https://github.com/Florian-Fiebig/BCPNN-for-NEST222-MPI>

## 417 Parameter Tables

418

|                          |             |        |                             |                   |        |                            |                   |         |
|--------------------------|-------------|--------|-----------------------------|-------------------|--------|----------------------------|-------------------|---------|
| Adaptation current       | $b$         | 86 pA  | Depression time constant    | $\tau_{rec}$      | 500 ms | BCPNN AMPA gain            | $w_{gain}^{AMPA}$ | 3.93 nS |
| Adaptation time constant | $\tau_{Iw}$ | 500 ms | AMPA synaptic time constant | $\tau^{AMPA}$     | 5 ms   | BCPNN NMDA gain            | $w_{gain}^{NMDA}$ | 0.21 nS |
| Membrane Capacity        | $C_m$       | 280 pF | NMDA synaptic time constant | $\tau^{NMDA}$     | 100 ms | BCPNN bias current gain    | $\beta_{gain}$    | 90 pA   |
| Leak Reversal Potential  | $E_L$       | -70 mV | GABA synaptic time constant | $\tau^{GABA}$     | 5 ms   | BCPNN lowest rate          | $f_{min}$         | 0.2 Hz  |
| Leak Conductance         | $g_L$       | 14 pS  | AMPA Reversal Potential     | $E^{AMPA}$        | 0 mV   | BCPNN highest rate         | $f_{max}$         | 20 Hz   |
| Upstroke slope factor    | $\Delta_T$  | 3 mV   | NMDA Reversal Potential     | $E^{NMDA}$        | 0 mV   | BCPNN lowest probability   | $\epsilon$        | 0.01    |
| Spike Threshold          | $V_t$       | -55 mV | GABA Reversal Potential     | $E^{GABA}$        | -75 mV | BCPNN Spike event duration | $\Delta t$        | 1 ms    |
| Spike Reset Potential    | $V_r$       | -80 mV | Dopaminergic Modulation     | $\kappa_p$        | 6.0    | P-Trace time constant      | $\tau_p$          | 5 s     |
| Utilization factor       | $U$         | .33    | Regular Plasticity          | $\kappa_{normal}$ | 1.0    |                            |                   |         |

419 **Table 1. Neurons, synapses, and plasticity.**

|                           |                    |                 |                                                                 |                             |                        |
|---------------------------|--------------------|-----------------|-----------------------------------------------------------------|-----------------------------|------------------------|
| STM patch size            | 17 x 17 mm         |                 | Initialization Input rate layer 2/3                             | $r_{bg}^{L23-low}$          | 550 Hz                 |
| Simulated HCs             | $n_{HC}^{STM}$     | 25              | Background activity rate layer 2/3                              | $r_{bg}^{L23}$              | 625 Hz                 |
| Simulated MC per HC       | $n_{MC}^{STM}$     | 12              | Background activity rate layer 4                                | $r_{bg}^{L4}$               | 300 Hz                 |
| LTM patch size            | 25 x 25 mm         |                 | High Background activity rate layer 2/3 (e.g. STM Maintainance) | $r_{bg}^{L23-high}$         | 950 Hz                 |
| Simulated HCs             | $n_{HC}^{LTM}$     | 16              |                                                                 |                             |                        |
| Simulated MC per HC       | $n_{MC}^{LTM}$     | 9               | Background conductance                                          | $g_{bg}$                    | $\pm 1.5$ nS           |
| Axonal Conduction Speed   | $V$                | $2 \frac{m}{s}$ |                                                                 |                             |                        |
| Minimal conduction delay  | $t_{min}^{syn}$    | 1.5 ms          | Cue stimulus duration                                           | $t_{cue}$                   | 50 ms                  |
| STM – LTM distance        | $d_{STM-LTM}$      | 40 mm           | Stimulation rate                                                | $r_{cue}$                   | 650 Hz                 |
| Hypercolumn diameter      | $d_{HC}$           | 0.64 mm         | Cue stimulus conductance                                        | $g_{cue}$                   | +1.5 nS                |
| Layer 2 pyramidal per MC  | $n_{MC}^{PYR-L2}$  | 20              | LTM Intra HC – Intra MC weight                                  | $w_{IntraMC}^{IntraHC}$     | $3.36 w_{gain}^{syn}$  |
| Layer 3A pyramidal per MC | $n_{MC}^{PYR-L3A}$ | 5               | LTM Intra HC – Inter MC weight                                  | $w_{InterMC}^{IntraHC}$     | $-4.82 w_{gain}^{syn}$ |
| Layer 3B pyramidal per MC | $n_{MC}^{PYR-L3B}$ | 5               |                                                                 |                             |                        |
| Layer 4 pyramidal per MC  | $n_{MC}^{PYR-L4}$  | 30              | LTM Inter HC – Coactive MC weight                               | $w_{CoactiveMC}^{InterHC}$  | $3.08 w_{gain}^{syn}$  |
| Basket cells per MC       | $n_{MC}^{basket}$  | 4               | LTM Inter HC – Competing MC weight                              | $w_{CompetingMC}^{InterHC}$ | $-4.28 w_{gain}^{syn}$ |

420 **Table 2. Network size, Conduction delay, Stimulation, LTM Preload BCPNN weights. Layer 4 not simulated in**  
 421 **LTM.**

422

423

| Scope         | Source    | Target    | Type                 | Symbol               | Value        |
|---------------|-----------|-----------|----------------------|----------------------|--------------|
| Cortical Area | Pyramidal | Basket    | probability          | $p_{P-B}$            | 0.7          |
|               | Pyramidal | Basket    | conductance (static) | $g_{P-B}$            | +3.5 nS      |
|               | Basket    | Pyramidal | probability          | $p_{B-P}$            | 0.7          |
|               | Basket    | Pyramidal | conductance (static) | $g_{B-P}$            | -20 nS       |
|               | L23e      | L23e      | probability          | $p_{L23e-L23e}$      | 0.2          |
|               | L23e      | L23e      | AMPA gain (BCPNN)    | $w_{gain}^{AMPA}$    | 3.93nS       |
|               | L23e      | L23e      | NMDA gain (BCPNN)    | $w_{gain}^{NMDA}$    | 0.21nS       |
|               | L4e       | L23e      | probability          | $p_{L4e-L23e}$       | 0.25         |
|               | L4e       | L23e      | conductance (static) | $g_{L4e-L23e}$       | 25 nS        |
| Feed forward  | LTM L3Ae  | STM MC    | probability          | $p_{L3Ae-MC}^{FF}$   | 0.0015       |
|               | LTM L3Ae  | STM MC    | branching factor     | $b_{L3Ae-MC}^{FF}$   | 0.25         |
|               | LTM L3Ae  | STM L23e  | conductance (static) | $g_{L3Ae-L23e}^{FF}$ | $\pm 7.2$ nS |
|               | LTM L3Ae  | STM L4e   | conductance (static) | $g_{L3Ae-L4e}^{FF}$  | $\pm 7.2$ nS |
| Feedback      | STM PYR   | LTM PYR   | probability          | $p_{P-P}^{FB}$       | 0.0066       |
|               | STM L3Be  | LTM HC    | branching factor     | $b_{L3Be-HC}^{FB}$   | 0.25         |
|               | STM L3Be  | LTM L23e  | AMPA gain (BCPNN)    | $w_{FB}^{AMPA}$      | 7.07 nS      |
|               | STM L3Be  | LTM L23e  | NMDA gain (BCPNN)    | $w_{FB}^{NMDA}$      | 0.4 nS       |

424 **Table 3. Projections**

## 425 Results

426 Our model implements WM function arising from the interaction of STM and LTM networks, which  
 427 manifests itself in multi-modal memory binding phenomena. To this end, we simulate three cortical  
 428 patches with significant biophysical detail: one STM and two LTM networks (LTMa, LTMb),  
 429 representing PFC and parieto-temporal areas, respectively (**Figure 2**). The computational network  
 430 model used here represents a detailed modular cortical microcircuit architecture in line with previous  
 431 models (Lundqvist, Rehn, Djurfeldt, & Lansner, 2006; Tully et al., 2016; Lundqvist et al., 2011). Like  
 432 those models, the new model can reproduce a wide range of meso- and macroscopic biological  
 433 manifestations of cortical memory function including complex oscillatory dynamics and  
 434 synchronization effects (Lundqvist et al. 2011; Lundqvist et al. 2013; Silverstein & Lansner 2011). The  
 435 current model is built directly upon a recent STM model of human word-list learning (Fiebig &  
 436 Lansner 2017). The associative cortical layer 2/3 network of that model was sub-divided into layers 2,  
 437 3A, and 3B. Importantly, in this work we extend this model with an input layer 4 and corticocortical  
 438 connectivity to LTM stores in temporal cortical regions. This large, multi-area network model  
 439 synthesizes many different anatomical and electrophysiological cortical data and produces complex  
 440 output dynamics. Here, we specifically focus on the dynamics of memory specific subpopulations in  
 441 the interaction of STM and LTM networks.

442 We introduce the operation of the WM model in several steps. First, we take a brief look at  
 443 background activity and active memory states in isolated cortical networks of this kind to familiarize  
 444 the reader with some of its dynamical properties. Second, we describe the effect of memory  
 445 activation on STM with and without plasticity. Third, we add the plastic backprojections from STM to  
 446 LTM and monitor the encoding and maintenance of several memories in the resulting STM-LTM loop.  
 447 We track the evolution of acquired cell assemblies with shared pattern-selectivity in STM and show  
 448 their important role in WM maintenance (aka delay activity). We then demonstrate that the  
 449 emerging WM network system is capable of flexibly updating the set of maintained memories.  
 450 Finally, we simulate multi-modal association and analyze its dynamical correlates. We explore  
 451 temporal characteristics of network activations, the accompanying oscillatory behavior of the  
 452 synthesized field potentials, cross-cortical delays as well as gamma-band coupling (coherence and

453 phase synchronization) between LTM networks during WM encoding, maintenance, and cue-driven  
 454 associative recall of multi-modal memories (LTMa-LTMb pairs of associated memories).

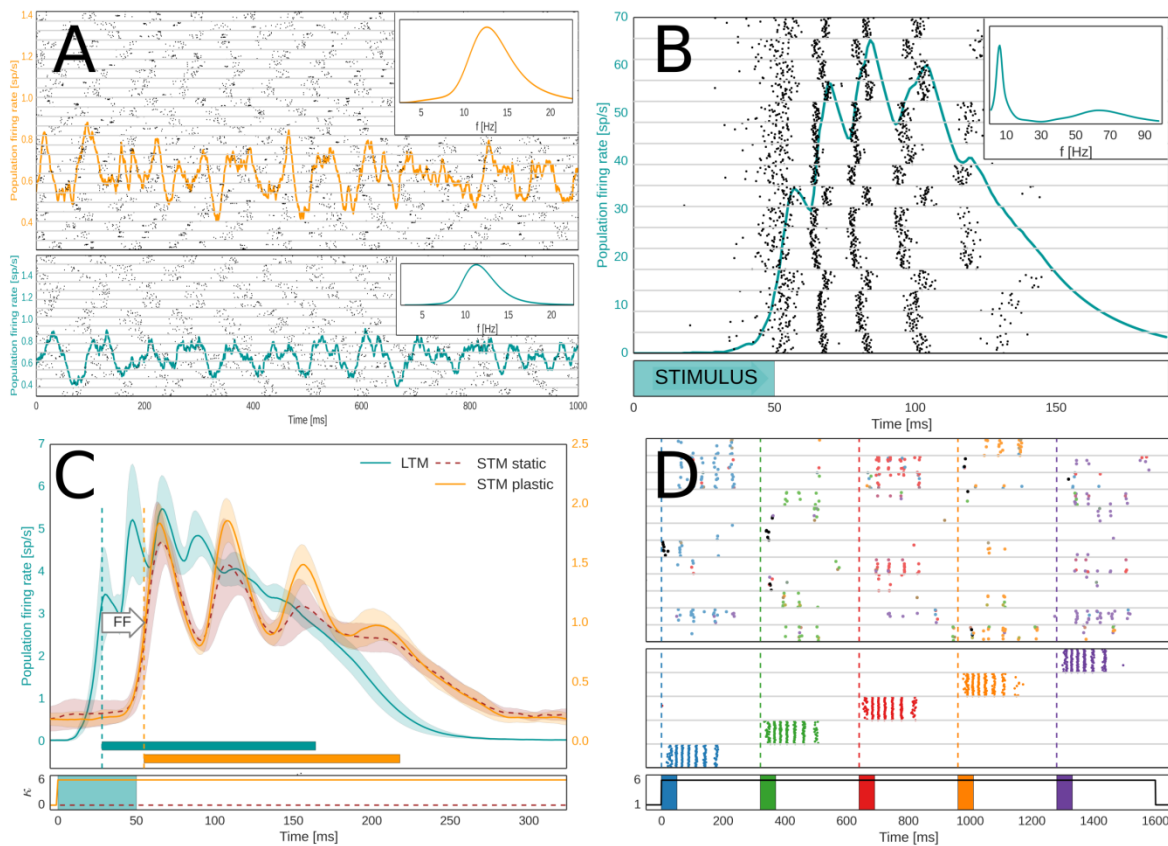

455 **Figure 3. Basic Network behavior in spike rasters and population firing rates.** **A: Activity in the untrained network under strong**  
 456 **background input.** **A:** Subsampled spike raster of STM (top) and LTM (bottom) layer 2/3 activity. HCs are separated by grey horizontal  
 457 lines. Global oscillations in the alpha range (10-13 Hz) characterize this activity state in both STM (top) and LTM (bottom) in the absence of  
 458 attractors. Inset: Power Spectral Density of each network's LFP. **B:** Cued LTM memory activation express as fast oscillation bursts of  
 459 selective cells (50-80 Hz), organized into a theta-like envelope (4-8 Hz), see also Power Spectrum Inset. The gamma-band is broad due to  
 460 varying length of the underlying cycles, i.e. noticeably increasing over the short memory activation period. The underlying spike raster  
 461 shows layer 2/3 activity of the activated MC in each HC, revealing spatial synchronization. The brief stimulus is a memory specific cue. **C:**  
 462 LTM-to-STM forward dynamics as shown in population firing rates of STM and LTM activity following LTM-activation induced by a 50 ms  
 463 targeted stimulus at time 0. LTM-driven activations of STM are characterized by a feedforward delay (FF). Shadows indicate the standard  
 464 deviation of 100 peri-stimulus activations in LTM (blue) and STM with (orange) and without plasticity enabled (dashed, dark orange).  
 465 Horizontal bars indicate the activation half-width (*Methods*). Onset is denoted by vertical dashed lines. The stimulation of LTM and  
 466 activation of plasticity is denoted underneath. **D:** Subsampled spike raster of STM (top) and LTM (middle) during forward activation of the  
 467 untrained STM by five different LTM memory patterns, triggered via specific memory cues in LTM at times marked by the vertical dashed  
 468 lines. Bottom spike raster shows LTM layer 2/3 activity of one selective MC per activated pattern (colors indicate different patterns). Top  
 469 spike raster shows layer 2/3 activity of one HC in STM. STM spikes are colored according to each cells dominant pattern-selectivity (based  
 470 on the memory pattern correlation of individual STM cell spiking during initial pattern activation, see *Methods*, *Spike Train Analysis and*  
 471 *Memory Activity Tracking*). Bottom: The five stimuli to LTM (colored boxes) and modulation of STM plasticity (black line).  
 472  
 473

474 **Figure Supplement 1. Basic Network behavior in spike rasters and population firing rates under low input.**

475 **Figure Supplement 2. Network activity during plasticity-modulated stimulation with 20% spatial extent.**

## 476 Background activity and Activated memory

477 The untrained network (see *Methods*) features fluctuations in membrane voltages and low-rate,  
 478 asynchronous spiking activity (**Figure 3 – Supplement 1**). At higher background input levels, the  
 479 empty network transitions into a state characterized by global oscillations of the population firing  
 480 rates in the alpha/beta range (**Figure 3A**). This is largely an effect of fast feedback inhibition from  
 481 local basket cells (**Figure 1**), high connection density within MCs, and low latency local spike  
 482 transmission (Lundqvist et al. 2010). If the network has been trained with structured input so as to  
 483 encode memory (i.e. attractor states), background noise or a specific cue (*Methods*) can trigger



484 memory item reactivations accompanied by fast broad-band oscillations modulated by an underlying  
485 slow oscillation in the lower theta range (~4-8 Hz) (Lundqvist et al. 2011; Herman et al. 2013) (**Figure**  
486 **3B**). The spiking activity of memory activations (aka attractors) is short-lived due to neural adaptation  
487 and synaptic depression. When unspecific background excitation is very strong, this can result in a  
488 random walk across stored memories (Fiebig & Lansner 2017; Lundqvist et al. 2011).

#### 489 LTM-to-STM Forward Dynamics

490 We now consider cued activation of several memories embedded in LTM. Each HC in LTM features  
491 selectively coding MCs for given memory patterns that activate synchronously in theta-like cycles  
492 each containing several fast oscillation bursts (**Figure 3B**). Five different LTM memory patterns are  
493 triggered by brief cues, accompanied by an upregulation of STM plasticity, see **Figure 3D (bottom)**.  
494 To indicate the spatio-temporal structure of evoked activations in STM, we also show a simultaneous  
495 subsampled STM spike raster (**Figure 3D top**). STM activations are sparse (ca 5%), but despite this,  
496 nearby cells (in the same MC) often fire together. The distributed, patchy character of the STM  
497 response to memory activations (**Figure 3D top**) is shaped by branching forward-projections from  
498 LTM layer 3B cells, which tend to activate close-by cells. STM input layer 4 receives half of these  
499 corticocortical connections and features very high fine-scale specificity in its projections to layer 2/3  
500 pyramidal neurons, which furthers recruitment of local clusters with shared selectivity. STM cells  
501 initially fire less than those in LTM because the latter received a brief, but strong activation cue and  
502 have strong recurrent connections if they code for the same embedded memory pattern. STM spikes  
503 in **Figure 3D** are colored according to the cells' dominant memory pattern selectivity (*Methods, Spike*  
504 *Train Analysis and Memory Activity Tracking*), which reveals that STM activations are mostly non-  
505 overlapping as well. Unlike the organization of LTM with strictly non-overlapping memory patterns,  
506 MC activity in STM is not exclusive to any given input pattern. Nevertheless, nearby STM cells often  
507 develop similar pattern selectivity. On the other hand, different stimulus patterns typically develop  
508 quite non-overlapping STM representations. This is due to the randomness in feed-forward LTM to  
509 STM connectivity, competition via basket cell feedback inhibition, and short-term dynamics, such as  
510 neural adaptation and synaptic depression. STM neurons that have recently been activated by a  
511 strong, bursting input from LTM are refractory and thus less prone to spike again for some time  
512 thereafter ( $\tau_{rec}$  and  $\tau_{I_w}$ , **Table 1**), further reducing the likelihood of creating overlapping STM  
513 representations for different patterns.

514 **Figure 3C** shows peri-stimulus population firing rates of both STM and LTM networks (mean across  
515 100 trials with five triggered memories each). There is a bottom-up response delay between stimulus  
516 onset at  $t=0$  and LTM activation, as well as a substantial forward delay. Oscillatory activity in STM is  
517 lower than in LTM mostly because the untrained STM lacks strong recurrent connections. It is thus  
518 less excitable, and therefore does not trigger its basket cells (the main drivers of fast oscillations in  
519 our model) as quickly as in LTM. Fast oscillations in STM and the amplitude of their theta-like  
520 envelope build up within a few seconds as new cell assemblies become stronger (e.g. **Figure 4A** and  
521 **Figure 4 - Supplement 1**). As seen in **Figure 3B**, bursts of co-activated MCs in LTM can become  
522 asynchronous during activation. Dispersed forward axonal conduction delays further decorrelate this  
523 gamma-like input to STM. Activating strong plasticity in STM ( $\kappa = \kappa_p$ , *Methods* and **Table 1**) has a  
524 noticeable effect on the amplitude of stimulus-locked oscillatory STM activity after as little as 100 ms  
525 (cf. **Figure 3C, STM**).

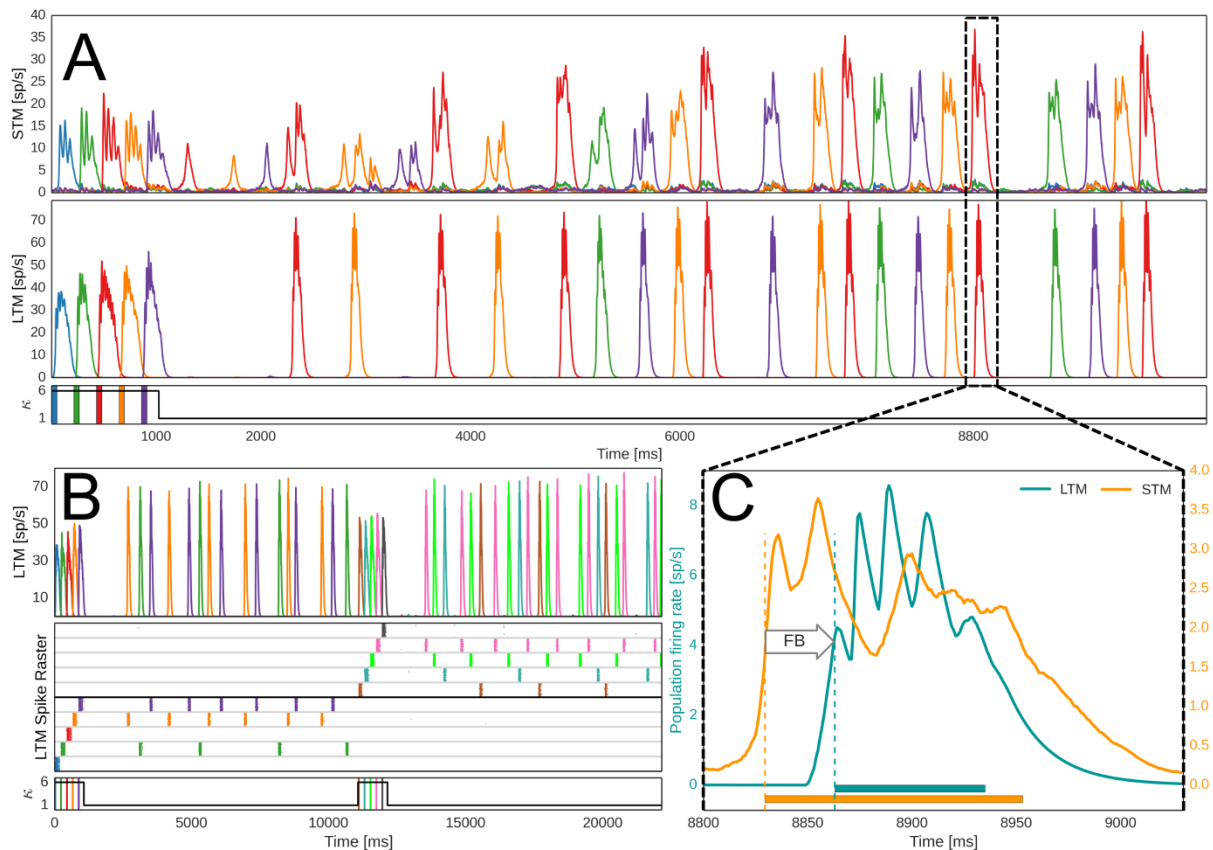

526  
527 **Figure 4. Encoding and feedback-driven reactivation of LTM.** A: Firing rates of pattern-specific subpopulations in STM and LTM during  
528 encoding and subsequent maintenance of five memories. Just as in the plasticity-modulated stimulation phase shown in Figure 2D, five  
529 LTM memories are cued via targeted 50 ms stimuli (shown underneath). Plasticity of STM and its backprojections is again elevated six-fold  
530 during the initial memory activation. Thereafter, a strong noise drive to STM causes spontaneous activations and plasticity induced  
531 consolidation of pattern-specific subpopulations in STM (lower plasticity,  $\kappa = 1$ ). Backprojections from STM cell assemblies help reactivate  
532 associated LTM memories. B: Updating of WM. Rapid encoding and subsequent maintenance of a second group of memories following an  
533 earlier set. The LTM spike raster shows layer 2/3 activity of one LTM HC (MCs separated by grey horizontal lines), the population firing rate  
534 of pattern-specific subpopulations across the whole LTM network is seen above. Underneath we denote stimuli to LTM and the modulation  
535 of plasticity,  $\kappa$ , in STM and its backprojections. C: STM-to-LTM loop dynamics during a spontaneous reactivation event. STM-triggered  
536 activations of LTM memories are characterized by a feedback delay and a second peak in STM after LTM activations. Horizontal bars at the  
537 bottom indicate activation half-width (Methods). Onset is denoted by vertical dashed lines.

538 **Figure 4 – Supplement 1. Spikeraster during encoding and feedback-driven reactivation of long-term memories.**

539 **Figure 4 – Supplement 2. Spike raster during WM updating.**

540 **Figure 4 – Supplement 3. Spike rates during WM updating.**

## 541 Multi-item Working Memory

542 In **Figure 3D**, we have shown pattern-specific subpopulations in STM emerging from feedforward  
543 input. Modulated STM plasticity allows for the quick formation of rather weak STM cell assemblies  
544 from one-shot learning. When we include plastic STM backprojections, these assemblies can serve as  
545 an index for specific LTM memories and provide top-down control signals for memory maintenance  
546 and retrieval. STM backprojections with fast Hebbian plasticity can index multiple activated  
547 memories in the closed STM-LTM loop. In **Figure 4A**, we show network activity following targeted  
548 activation of five LTM memories (Spike raster in **Figure 4 - Supplement 1**). Under an increased  
549 unspecific noise-drive ( $\tau_{bg}^{L23-high}$ , **Table 2**), STM cell assemblies, formed during the brief plasticity-  
550 modulated stimulus phase (cf. **Figure 3D**) may activate spontaneously. These brief bursts of activity  
551 are initially weak and different from the theta-like cycles of repeated fast bursting seen in LTM  
552 attractor activity.

553 STM recurrent connections remain plastic ( $\kappa = 1$ ) throughout the simulation, so each reactivation  
554 event further strengthens memory-specific cell assemblies in STM. As a result, there is a noticeable  
555 ramp-up in the strength of STM pattern-specific activity over the course of the delay period (cf.  
556 increasing burst length and amplitude in **Figure 4A**, or **Figure 4 - Supplement 2**). STM backprojections  
557 are also plastic and thus acquire memory specificity from STM-LTM co-activations, especially during  
558 the initial stimulation phase. Given enough STM cell assembly firing, their sparse but potentiated  
559 backprojections can trigger associated memories in LTM. Weakly active assemblies may fail to do so.  
560 In the example of **Figure 4A**, we can see a few early STM reactivations that are not accompanied (or  
561 quickly followed) by a corresponding LTM pattern activation (of the same color) in the first two  
562 seconds after the plasticity-modulated stimulation phase. When LTM is triggered, there is a  
563 noticeable feedback delay (**Figure 4C**), which we will address together with aforementioned feed  
564 forward delays in the analysis of recall dynamics during a multi-item, multi-modal recall task.

565 Cortical feedforward and feedback pathways between LTM and STM form a loop, so each LTM  
566 activation will again feed into STM, typically causing a second peak of activation in STM 40 ms after  
567 the first (**Figure 4C**). The forward delay from LTM to STM, which we have seen earlier in the stimulus-  
568 driven input phase (**Figure 3C**), is still evident here in this delayed secondary increase of the STM  
569 activation following LTM onset. The reverberating cross-cortical activation extends/sustains the  
570 memory activation and thus helps stabilize item-specific STM cell assemblies and their specificity.  
571 This effect may be called auto-consolidation and it is an emergent feature of the plastic STM-LTM  
572 loop in our model. It occurs on a timescale governed by the unmodulated plasticity time constant  
573 ( $\kappa = \kappa_{normal}$ ,  $\tau_p = 5$  s, **Table 1**). After a few seconds, the network has effectively stabilized and  
574 typically maintains a small set of 3-4 activated long-term memories. The closed STM-LTM loop thus  
575 constitutes a functional multi-item WM.

576 A crucial feature of any WM system is its flexibility, and **Figure 3B** highlights an example of rapid  
577 updating. The maintained set of activated memories can be weakened by stimulating yet another set  
578 of input memories. Generally speaking, earlier items are reliably displaced from active maintenance  
579 in our model if activation of the new items is accompanied by the same transient elevation of  
580 plasticity ( $\kappa_p/\kappa_{normal}$ , **Table 1**) used during the original encoding of the first five memories  
581 (Corresponding population firing rates and spike rasters are shown in **Figures 4 - Supplements 2,3**).

582 In line with the earlier results (Fiebig & Lansner 2017), cued activation can usually still retrieve  
583 previously maintained items. The rate of decay for memories outside the maintained set depends  
584 critically on the amount of noise in the system, which erodes the learned associations between STM  
585 and LTM neurons as well as STM cell assemblies. We note that such activity-dependent memory  
586 decay is substantially different from time-dependent decay, as shown by Mi et al.(2017).

### 587 Multi-modal, Multi-item Working Memory

588 Next, we explore the ability of the closed STM-LTM loop system to flexibly bind co-active pairs of  
589 long-term memories from different modalities (LTMa and LTMB, respectively). As both LTM  
590 activations trigger cells in STM via feedforward projections, a unique joint STM cell assembly with  
591 shared pattern-selectivity is created. Forward-activations include excitation and inhibition and  
592 combine non-linearly with each other (*Methods*) and with prior STM content.

593 **Figure 5** illustrates how this new index then supports WM operations, including delay maintenance  
594 through STM-paced co-activation events and stimulus-driven associative memory pair completion.  
595 The three columns of **Figure 5** illustrate three fundamental modes of the closed STM-LTM loop:  
596 stimulus-driven encoding, WM maintenance, and associative recall. The top three rows show  
597 sampled activity of a single trial (see also **Figure 5 – Supplement 1**), whereas the bottom row shows  
598 multi-trial averages.

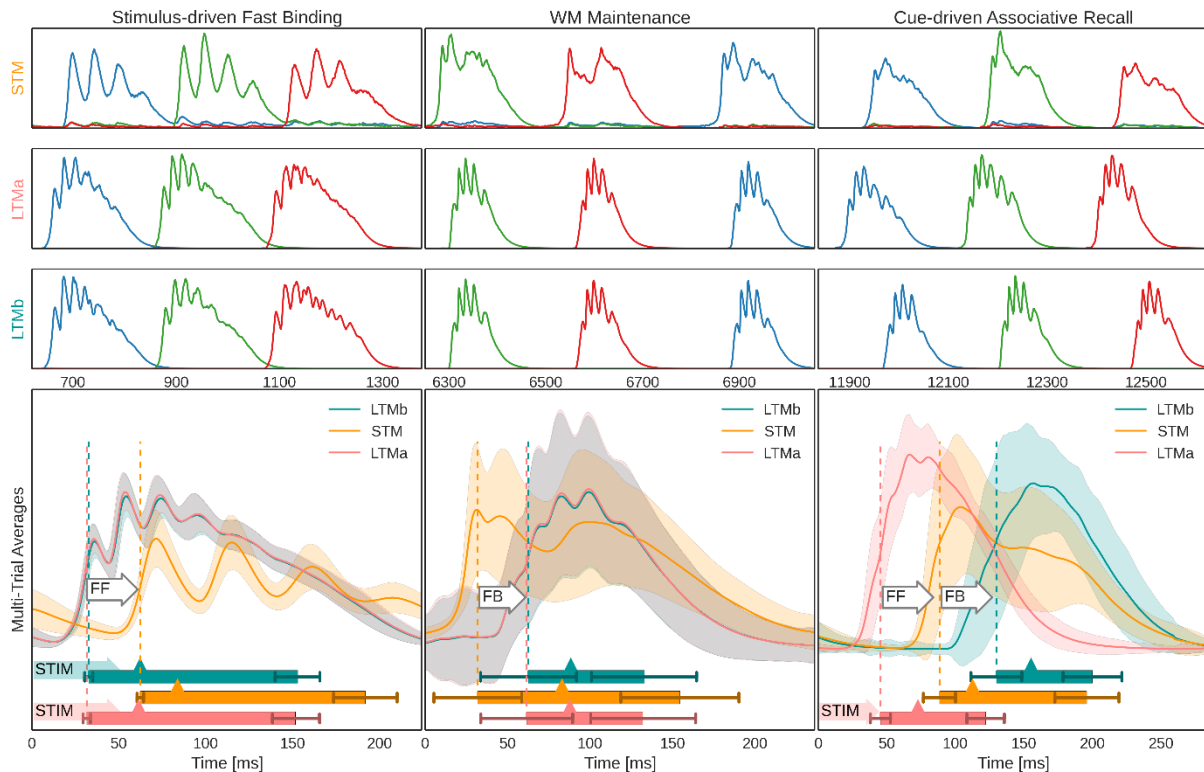

599  
 600 **Figure 5. Population firing rates of networks and memory-specific subpopulations during three different modes of network activity :**  
 601 **Top-Half:** Exemplary activation of three memories (blue, green, red respectively) in STM (1<sup>st</sup> row), LTMa (2<sup>nd</sup> row), and LTMb (3<sup>rd</sup> row)  
 602 during three different modes of network activity: The initial association of pairs of LTM memory activations in STM (left column), WM  
 603 Maintenance through spontaneous STM-paced activations of bound LTM memory pairs (middle column), and cue-driven associative recall  
 604 of previously paired stimuli (right column). **Bottom-Half:** Multi-trial peri-stimulus activity traces from the three cortical patches across 100  
 605 trials (495 traces, as each trial features 5 activated and maintained LTM memory pairs and very few failures of paired activation). Shaded  
 606 areas indicate a standard deviation from the underlying traces. Vertical dashed lines denote mean onset of each network's activity, as  
 607 determined by activation half-width (*Methods*), also denoted by a box underneath the traces. Error bars indicate a standard deviation from  
 608 activation onset and offset. Mean peak activation is denoted by a triangle on the box, and shaded arrows to the left of the box denote  
 609 targeted pattern stimulation of a network at time 0. As there are no external cues during WM maintenance (aka delay period), we use  
 610 detected STM activation onset to align firing rate traces of 5168 STM-paced LTM-reactivations across trials and reactivation events for  
 611 averaging. White arrows annotate feedforward (FF) and feedback (FB) delay, as defined by respective network onsets.

612 **Figure 5 - Supplement 1. Spiking activity in the three networks, during the multi-modal LTM binding task.**

613 During stimulus-driven association, we co-activate memories from both LTMs by brief 50 ms cues  
 614 that trigger activation of the corresponding memory patterns. The average of peri-stimulus  
 615 activations reveals  $45 \pm 7.3$  ms LTM attractor activation delay, followed by  $43 \pm 7.8$  ms feedforward  
 616 delay (about half of which is explained by axonal conduction delays due to the spatial distance  
 617 between LTM and STM) from the onset of the LTM activations to the onset of the input-specific STM  
 618 response (**Figure 5 top-left and bottom-left**).

619 During WM maintenance, a 10 s delay period, paired LTM memories reactivate together. Onset of  
 620 these paired activations is a lot more variable than during cued activation with a feedback delay  
 621 mean of  $41.5 \pm 15.3$  ms, mostly because the driving STM-activations are of variable size and strength.  
 622 Over the course of the maintenance period the oscillatory dynamics of the LTMs changes. In  
 623 particular, LFP spectral power as well as coherence between LTMs in the broad gamma (30-80 Hz)  
 624 band increases ( $p < 0.001$  for each of two permutation tests comparing average spectral  
 625 power/coherence in the gamma band between two intervals during the delay period: 4-8 s and 8-12  
 626 s;  $n = 25$  trials). To study the fast oscillatory dynamics of the LFP interactions between LTMs during the  
 627 WM maintenance, mediated by STM, we follow up the coherence analysis and examine the gamma  
 628 phase synchronization effect using PLV with 0.5 s sliding window (see *Methods*). It appears that the  
 629 gamma phase coupling also increases during the second part of the WM maintenance period  
 630 ( $p < 0.001$  in analogous permutation test as above; **Figure 6**).

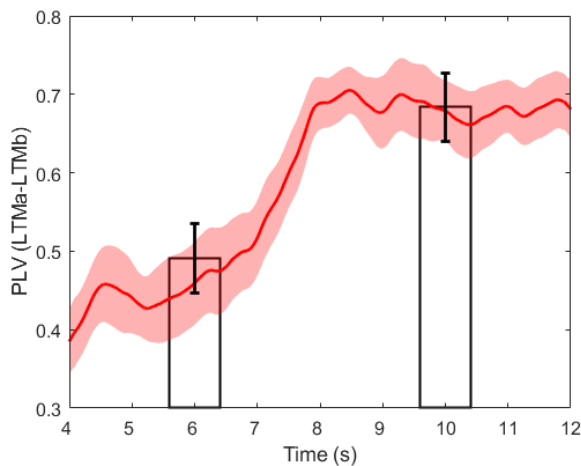

**Figure 6. Gamma-band Phase Locking Value (PLV) between LTMa and LTMb during WM maintenance.** PLV is estimated using sliding window of size 0.5 s (the period between 4 and 12 s is shown). Two bars demonstrate the average gamma-band PLV over the first (4-8 s) and the second part (8-12 s) of the WM maintenance period. Shaded area and error bars correspond to the standard error of the mean calculated over n=25 trials.

642 Following the maintenance period, we test the memory system's ability for bi-modal associative  
 643 recall. To this end, we cue LTMa, again using a targeted 50 ms cue for each memory, and track the  
 644 systems response across the STM-LTM loop. We compute multi-trial averages of peri-stimulus  
 645 activations during recall testing (**Figure 5 bottom-right**). Following cued activation of LTMa, STM  
 646 responds with the related joint cell assembly activation as the input is strongly correlated to the  
 647 learned inputs, as a result of the simultaneous activation with LTMb earlier on. Similar to the  
 648 mnemonic function of an index, the completed STM pattern then triggers the associated memory in  
 649 LTMb through backprojections. STM activation now extends far beyond the transient activity of LTMa  
 650 because STM recurrent connectivity and the STM-LTMb recurrence re-excites it. Temporal overlap  
 651 between associated LTMa and LTMb memory activations peaks around 125 ms after the initial  
 652 stimulus to LTMa.

### 653 Network Power Spectra and the Non Associative Control Case

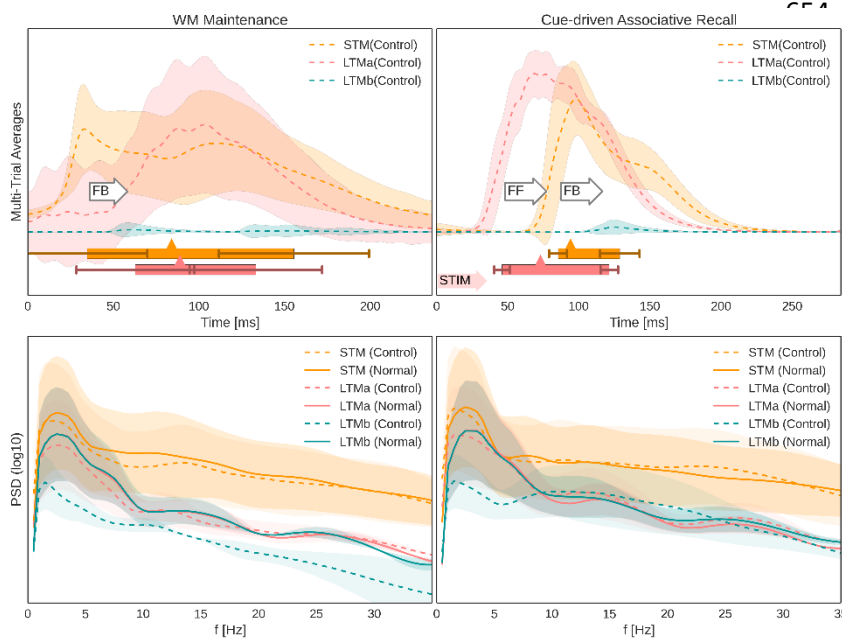

**Figure 7. Non-Associative Control Case and Power Spectral Analysis: Top-Half:** Multi-trial peri-stimulus activity traces from the three cortical patches across 25 trials following WM-encoded LTMa activations as before, but without associated LTMb memory activations. Shaded areas indicate a standard deviation from the underlying traces. Activation half-widths (*Methods*) denoted by a box underneath the traces. Error bars indicate a standard deviation from activation onset and offset. Mean peak activation is denoted by a triangle on the box, and shaded arrows to the left of the box denote targeted pattern stimulation of LTMa at time 0. As there are no external cues during WM maintenance (aka delay period), we use detected STM activation onset to align firing rate traces of 406 STM-paced LTMa-reactivations across trials and reactivation events for averaging. There is no evidence of associated LTMb activations in the control case (only small

679 increases in spike rate variability). White arrows annotate feedforward (FF) and feedback (FB) delay, as defined by respective network  
 680 onsets. **Bottom-Half:** Power spectral density of synthesized LFPs estimated over the maintenance (left) and recall (right) periods for STM  
 681 and both LTMs in two cases: with (solid lines) and without (dashed line; control case) associated LTMb memory activations. Please note the  
 682 log-scale. Shaded areas correspond to the standard deviation of the mean PSD over 25 trials. The decrease in theta- and gamma-band  
 683 power observed during the maintenance (left) and recall (right) periods in the LTMb in the control case is due to lack of memory pattern  
 684 reactivations in LTMb as they are not associated with LTMa via STM.

685 **Figure 7 - Supplement 1. Exemplary recording of the Local Field Potential (LFP) signal in LTMb following two cued activations of LTMa**  
 686 **after learning and maintenance of associative LTMa-LTMb memory pairs (normal) or non-associative LTMa memories without**  
 687 **concurrent LTMb activation (control).**



688 **Figure 7 (top)** shows multi-trial peri-stimulus/peri-activation activity traces for a control task, where  
 689 learned and maintained LTMa items are not associated with concurrent LTMB activations. LTMa  
 690 items are still encoded in STM, maintained over the delay, and recalled by specific cues, but LTMB  
 691 now remains silent throughout the maintenance period (**Figure 7 top-left**) and as expected does not  
 692 show any evidence of memory activation following LTMa-specific cues during recall testing (**Figure 7**  
 693 **top-right**, see also LFP signal in **Figure 7 – Supplement 2**). The logarithmic power spectra (**Figure 7**  
 694 **bottom**) show a noticeable difference between the normal associative and the non-associative  
 695 control trials. The latter displays a significant drop in LTMB power across the board, particularly  
 696 during the maintenance period. This can be explained by the overall lower number of memory  
 697 reactivations in STM during the non-associative control task ( $2.58 \pm 0.28$  vs  $1.62 \pm 0.47$  reactivations/s).

## 698 Top-Down and Bottom-Up Delays

699 We collected distributions of feedforward and feedback delays during associative recall (**Figure 8**). To  
 700 facilitate a more immediate comparison with biological timing data we also computed the Bottom-Up  
 701 and Top-Down response latency of the model in analogy to Tomita et al. (1999). Their study explicitly  
 702 tested widely held beliefs about the executive control of PFC over ITC in memory retrieval. To this  
 703 end, they identified and recorded neurons in ITC of monkeys trained to memorize several visual  
 704 stimulus-stimulus associations. They employed a posterior-split brain paradigm to cleanly  
 705 disassociate the timing of the bottom-up (contralateral stimuli) and top-down response (ipsilateral  
 706 stimuli) in 43 neurons significantly stimulus-selective in both conditions. They observed that the  
 707 latency of the top-down response (178 ms) was longer than that of the bottom-up response (73 ms).

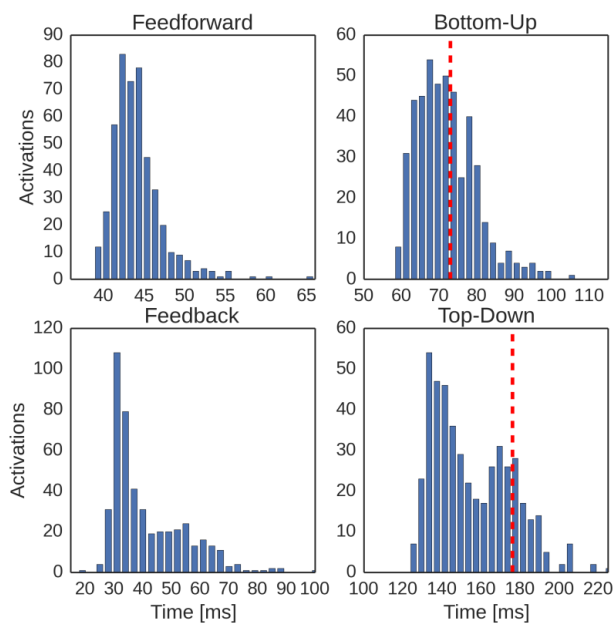

**Figure 8. Comparison of key activation delays during associative recall in model and experiment following a cue to LTMa. Top-Left:** Feedforward delay distribution in the model, as defined by the temporal delay between LTMa onset and STM onset (as shown in Figure 4, Bottom-right). **Top-Right:** Bottom-up delay distribution in the model, as defined by the temporal delay between stimulation onset and LTMa peak activation. The red line denotes the mean bottom-up delay, as measured by Tomita et al.(1999). **Bottom-Left:** Feedback delay distribution in the model, as defined by the temporal delay between STM onset and LTMB onset (measured by half-width, as shown in Figure 4, Bottom-right). **Bottom-Right:** Top-Down delay distribution in the model, as defined by the temporal delay between stimulation onset and LTMB peak activation. The red line denotes the mean bottom-up delay, as measured by Tomita et al.(1999). Model delays were averaged over 100 trials with 5 paired stimuli each.

728 Our simulation is analogous to this experimental setup with respect to some key features, such as the  
 729 spatial extent of memory areas (STM/dIPFC about  $289 \text{ mm}^2$ ) and inter-area distances (40 mm cortical  
 730 distance between PFC and ITC). These measures heavily influence the resulting connection delays  
 731 and time needed for information integration. In analogy to the posterior-split brain experiment, our  
 732 model's LTMa and LTMB are unconnected. However, we now have to consider them as ipsi- and  
 733 contralateral visual areas in ITC. The display of a cue in one hemi-field in the experiment then  
 734 corresponds to the LTMa-sided stimulation of an associated memory pair in the model. This  
 735 arrangement forces any LTM interaction through STM (representing PFC), and allows us to treat the  
 736 cued LTMa memory activation as a Bottom-up response, whereas the much later activation of the  
 737 associated LTMB representation is related to the Top-down response in the experimental study.  
 738 **Figure 8** shows the distribution of these latencies in our simulations, where we also marked the mean

739 latencies measured by Tomita et al. The mean of our bottom-up delay (72.9 ms) matches the  
740 experimental data (73 ms), whereas the mean of the broader top-down latency distribution (155.2  
741 ms) is a bit lower than in the monkey study (178 ms). Of these 155.2 ms, only 48 ms are explained by  
742 the spatial distance between networks, as verified by a fully functional alternative model with 0 mm  
743 distance between networks.

## 744 Discussion

745 In this work, we have proposed and studied a novel theory for WM that rests on the dynamic  
746 interactions between STM and LTM stores shaped by fast synaptic plasticity. In particular, it  
747 hypothesizes that activity in parieto-temporal LTM stores targeting PFC via fixed or slowly plastic and  
748 patchy synaptic connections triggers an activity pattern in PFC, which then gets rapidly encoded by  
749 means of fast Hebbian plasticity to form a cell assembly. Equally plastic backprojections from PFC to  
750 the LTM stores are enhanced as well, thereby associating the formed PFC “index” specifically with the  
751 active LTM cell assemblies. This rapidly but temporarily enhanced connectivity produces a functional  
752 WM system capable of encoding and maintaining multiple individual LTM items, i.e. bringing these  
753 LTM representations “on-line”, and forming novel associations within and between several  
754 connected LTM areas and modalities. The PFC cell assemblies themselves do not encode much  
755 information but act as indices into LTM stores, which contain additional information that is also more  
756 permanent. The underlying highly plastic connectivity and thereby the WM itself is flexibly  
757 remodeled and updated as new incoming activity gradually over-writes previous WM content.

758 We have studied the functional and dynamical implications of this theory by implementing and  
759 evaluating a special case of a biologically plausible large-scale spiking neural network model  
760 representing PFC reciprocally connected with two LTM areas (visual and auditory) in temporal cortex.  
761 We have shown how a number of single LTM items can be encoded and maintained “on-line” and  
762 how pairs of simultaneously activated items can become jointly indexed and associated. Activating  
763 one pair member now also activates the other one indirectly via PFC with a short latency. We have  
764 further demonstrated that this kind of WM can readily be updated such that as new items are  
765 encoded, old ones are fading away whereby the active WM content is replaced.

766 Recall dynamics in the presented model are in most respects identical to our previous cortical  
767 associative memory models (Lansner 2009). Any activated memory item, whether randomly or  
768 specifically triggered, is subject to known and previously well characterized associative memory  
769 dynamics, such as pattern completion, rivalry, bursty reactivation dynamics, oscillations in different  
770 frequency bands, etc. (Lundqvist et al. 2010; Silverstein & Lansner 2011; Lundqvist et al. 2013;  
771 Herman et al. 2013). Moreover, sequential learning and recall could readily be incorporated (Tully et  
772 al. 2013). This could for example support encoding of sequences of items in WM rather than a set of  
773 unrelated items, resulting in reactivation dynamics reminiscent of e.g. the phonological loop  
774 (Baddeley et al. 1998; Burgess & Hitch 2006).

### 775 The Case for Hebbian Plasticity

776 The underlying mechanism of our model is fast Hebbian plasticity, not only in the intrinsic PFC  
777 connectivity, but also in the projections from PFC to LTM stores. The former has some experimental  
778 support (Volianskis & Jensen 2003; Volianskis et al. 2015; Erickson et al. 2010; Park et al. 2014; Kauer  
779 et al. 2018) whereas the latter remains a prediction of the model. Dopamine D1 receptor (D1R)  
780 activation by dopamine (DA) is strongly implicated in reward learning and synaptic plasticity  
781 regulation in the basal ganglia (Wickens 2009). In analogy we propose that D1R activation is critically  
782 involved in the synaptic plasticity intrinsic to PFC and in projections to LTM stores, which would also  
783 explain the comparatively dense DA innervation of PFC and the prominent WM effects of PFC DA  
784 level manipulation (Arnsten & Jin 2014; Goto et al. 2010). In our model, the parameter  $\kappa$  represents

785 the level of DA-D1R activation, which in turn regulates its synaptic plasticity. We typically increase  
786 kappa 4-8 fold temporarily in conjunction with stimulation of LTM and WM encoding, in a form of  
787 attentional gating. Larger modulation limits WM capacity to 1-2 items, while less modulation  
788 diminishes the strength of cell assemblies beyond what is necessary for reactivation and LTM  
789 maintenance.

790 When the synaptic plasticity WM hypothesis was first presented and evaluated, it was based on  
791 synaptic facilitation (Mongillo et al. 2008; Lundqvist et al. 2011). However, such non-Hebbian  
792 plasticity is only capable of less specific forms of memory. Activating a cell assembly, comprising a  
793 subset of neurons in an untrained STM network featuring such plasticity, would merely facilitate all  
794 outgoing synapses from active neurons. Likewise, an enhanced elevated resting potential resulting  
795 from intrinsic plasticity would make the targeted neurons more excitable. In either case, there would  
796 be no coordination of activity specifically within the stimulated cell assembly. Thus, if superimposed  
797 on an existing LTM, such forms of plasticity may well contribute to WM, but they are by themselves  
798 not capable of supporting encoding of novel memory items or the multi-modal association of already  
799 existing ones. In contrast, in our previous work (Fiebig & Lansner 2017) we showed that fast Hebbian  
800 plasticity similar to STP (Erickson et al. 2010) allows effective one-shot encoding of novel STM items.  
801 In the extended model proposed here, PFC can additionally bind and bring on-line existing but  
802 previously unassociated LTM items across multiple modalities by means of the same kind of plasticity  
803 in backprojections from PFC to parieto-temporal LTM stores.

804 On a side note, our implementation of fast Hebbian plasticity reproduces a remarkable aspect of STP  
805 or Labile LTP: it decays in an activity-dependent manner rather than with time (Volianskis & Jensen  
806 2003; Volianskis et al. 2015; Kauer et al. 2018). Although we used the BCPNN learning rule to  
807 reproduce these effects, we expect that other Hebbian learning rules allowing for neuromodulated  
808 fast synaptic plasticity could give comparable results.

### 809 [Experimental support and Testable predictions](#)

810 Our model has been built from available relevant microscopic data on neural and synaptic  
811 components as well as modular structure and connectivity of selected cortical areas in macaque  
812 monkey. The network so designed generates a well-organized macroscopic dynamic working memory  
813 function, which can be interpreted in terms of manifest behavior and validated against cognitive  
814 experiments and data. Our model provides a powerful tool to investigate and examine the link  
815 between microscopic and macroscopic level processes and data. It suggests novel mechanistic  
816 hypotheses and inspiration for planning and performing experiments that can develop further the  
817 model, or potentially falsify it.

818 Unfortunately, the detailed neural processes and dynamics of our new model are not easily  
819 accessible experimentally as they are intrinsically expressed at multiple scales, e.g. mesoscopic field  
820 potentials and population spiking at macroscopic spatial scales. In consequence, it is difficult to find  
821 direct and quantitative results to validate the model. Yet, in analyzing our resulting bottom-up and  
822 top-down delays we drew an analogy to a split-brain experiment (Tomita et al. 1999) because of its  
823 clean experimental design (even controlling for subcortical pathways) and found similar temporal  
824 dynamics in our highly subsampled cortical model. The timing of inter-area signals also constitutes a  
825 testable prediction for multi-modal memory experiments. Furthermore, reviews of intracranial as  
826 well as electroencephalography (EEG) recordings conclude that theta band oscillations play an  
827 important role in long-range communication during successful memory retrieval (Johnson & Knight  
828 2015; Sauseng et al. 2004). With respect to theta band oscillations in our model, we have shown that  
829 STM leads the LTM networks during maintenance, engages bi-directionally during recall (due to the  
830 STM-LTM loop), and lags during stimulus-driven encoding and LTM activation, reflecting  
831 experimental observations (Anderson et al. 2010). These effects are explained by our model  
832 architecture, which imposes delays due to the spatial extent of networks and their distances from

833 each other. Fast oscillations in the broad gamma band, often nested in the theta cycle, are strongly  
834 linked to local processing and activated memory items in our model, also matching experimental  
835 findings (Canolty & Knight 2010; Johnson & Knight 2015). Local frequency coupling is abundant with  
836 significant phase-amplitude coupling (e.g. **Figure 3B**), and was well characterized in related models  
837 (Herman et al. 2013).

838 The most critical requirement and thus prediction of our theory and model is the presence of fast  
839 Hebbian plasticity in the PFC backprojections to parieto-temporal memory areas. Without such  
840 plasticity, our model cannot explain the necessary STM-LTM binding. This plasticity is likely to be  
841 subject to neuromodulatory control, presumably with DA and D1R activation involvement. Since STP  
842 decays with activity, a high noise level could be an issue since it could shorten WM duration (see *The*  
843 *Case for Hebbian Plasticity*). The evaluation of this requirement is hampered by little experimental  
844 evidence and a general lack of experimental characterization of the synaptic plasticity in long-range  
845 corticocortical projections.

846 One of the neurodynamical manifestations of the fast associative plasticity in the PFC backprojections  
847 is a functional coupling between LTM stores. Importantly, this long-range coupling in our model is  
848 mediated by the PFC network alone, as manifested during delay period free of any external cues, and  
849 is reflected in the synchronization of fast gamma oscillations. Although the predominant view has  
850 been that gamma is restricted to short distances, there is growing evidence for cortical long-distance  
851 gamma phase synchrony between task-relevant areas as a correlate of cognitive processes (Tallon-  
852 Baudry et al. 1998; Doesburg et al. 2008) including WM (Palva et al. 2010). In this regard, our model  
853 generates even a more specific prediction about the notable temporal enhancement of gamma  
854 phase coupling over the delay period, which could be tested with macroscopic human brain  
855 recordings, e.g. EEG or magnetoencephalography (MEG), provided that a WM task involves a  
856 sufficiently long delay period.

857 Finally, our model suggests the occurrence of a double peak of frontal network activation in  
858 executive control of multi-modal LTM association (see STM population activity during WM  
859 Maintenance in **Figure 5**). The first one originates from the top-down control signal itself, and the  
860 second one is a result of corticocortical reentry and a successful activation of one or more associated  
861 items in LTM. As such, the second peak should also be correlated with successful memory  
862 maintenance or associative recall.

863 Furthermore, our model also makes specific predictions of neuroanatomical nature about the density  
864 of corticocortical long-range connectivity. For example, as few as six active synapses (*Methods*) onto  
865 each coding pyramidal neuron are sufficient to transfer specific memory identities across the cortical  
866 hierarchy and to support maintenance and recall.

### 867 **Role of fast Hebbian plasticity in Variable Binding**

868 The “binding problem” is a classical and extensively studied problem in perceptual and cognitive  
869 neuroscience, see e.g. Zimmer et al. (2012). Binding occurs in different forms and at different levels,  
870 from lower perceptual to higher cognitive processes (Reynolds & Desimone 1999; Zimmer et al.  
871 2006). At least in the latter case, WM and PFC feature quite prominently (Cer & O’Reily 2012) and  
872 this is where our WM model may provide further insight.

873 Variable binding is a special case and a cognitive kind of neural binding in the form of a variable –  
874 value association of items previously not connected by earlier experience and learning (Cer & O’Reily  
875 2012; Garnelo & Shanahan 2019). A simple special case is the association of a mathematical variable  
876 and its value “The value of x is 2”, i.e.  $x = 2$ . More generally, an object and a name property can be  
877 bound like in “Charlie is my parrot” such that  $\langle \text{name} \rangle = \text{“Charlie”}$  (**Figure 9**). This and other more  
878 advanced forms of neural binding are assumed to underlie complex functions in human cognition

879 including logical reasoning and planning (Pinkas et al. 2012), but have been a challenge to explain by  
880 neural network models of the brain (Legenstein et al. 2016; van der Velde & de Kamps 2015).

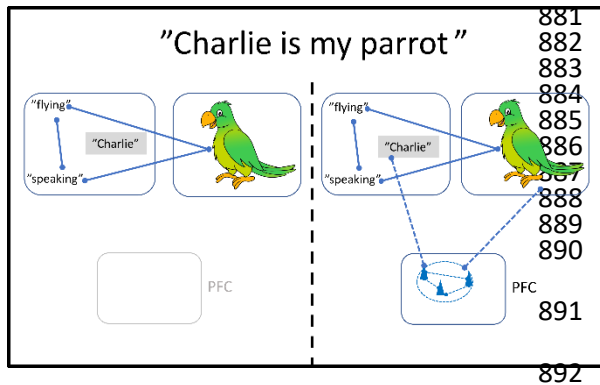

**Figure 9. Variable-value binding via PFC.** Initially the representation of “parrot” exists in LTM comprising symbolic and sub-symbolic components. When it is for the first time stated that “Charlie is my parrot”, the name “Charlie” is bound reciprocally by fast Hebbian plasticity via PFC to the parrot representation, thus temporarily extending the composite “parrot” cell assembly. Pattern completion now allows “Charlie” to trigger the entire assembly and “flying” or the sight of Charlie to trigger “Charlie”. If important enough or repeated a couple of times this association could consolidate in LTM.

893 Based on our WM model, we propose that fast Hebbian plasticity provides a neural mechanism that  
894 mediates such variable binding. The joint index to LTM areas formed in PFC/STM during presentation  
895 of a name – image stimulus pair serves to bind the corresponding LTM stored variable and value  
896 representations in a specific manner that avoids mixing them up. Turning to **Figure 5** above, imagine  
897 that one of the LTMA patterns represent the image of my parrot and one pattern in LTMB, now a  
898 cortical language area, represents his name “Charlie”. When this and two other image – name pairs  
899 are presented they are each associated via specific joint PFC indices. Thereafter “Charlie” will trigger  
900 the visual object representation of a parrot, and showing a picture of Charlie will trigger the name  
901 “Charlie” with a dynamics as shown in the right-most panels of **Figure 5**. Here as well, flexible  
902 updating of the PFC index will avoid confusion even if in the next moment my neighbor shouts  
903 “Charlie” to call his dog, also named Charlie.

904 Recent experiments have provided support for the involvement of PFC in such memory related forms  
905 of feature binding (Zmigrod et al. 2014). Gamma band oscillations, frequently implicated when  
906 binding is observed, are also a prominent output of our model (Tallon-Baudry & Bertrand 1999).  
907 Work is in progress to uncover how such variable binding mechanisms can be used in neuro-inspired  
908 models of more advanced human logical reasoning (Pinkas et al. 2013).

## 909 Conclusions

910 We have formulated a novel indexing theory for WM and tested it by means of computer  
911 simulations, which demonstrated the versatile WM properties of a large-scale spiking neural network  
912 model implementing key aspects of the theory. Our model provides a new mechanistic  
913 understanding of the targeted WM and variable binding phenomena, which connects microscopic  
914 neural processes with macroscopic observations and cognitive functions in a way that only  
915 computational models can do. While we designed and constrained this model based on macaque  
916 data, the theory itself is quite general and we expect our findings to apply also to mammals including  
917 humans, commensurate with changes in key model parameters (cortical distances, axonal  
918 conductance speeds, etc.). Many aspects of WM function remains to be tested and incorporated, e.g.  
919 its close interactions with basal ganglia (O’Reilly & Frank 2006).

920 WM dysfunction has an outsized impact on mental health, intelligence, and quality of life. Progress in  
921 mechanistic understanding of its function and dysfunction is therefore very important for society. We  
922 hope that our theoretical and computational work provides inspiration for experimentalists to  
923 scrutinize the theory and model, especially with respect to neuromodulated fast Hebbian synaptic  
924 plasticity and large-scale network architecture and dynamics. Only in this way can we get closer to a  
925 more solid understanding and theory of WM, and position future computational research  
926 appropriately even in the clinical and pharmaceutical realm.



## 927 **Supplementary Information**

### 928 **Model Robustness**

929 Our model incorporates a plethora of biological constraints, such as estimates on the extent and  
930 distance of areas (e.g. STM patch size approximates macaque dIPFC, and is 40mm from ITC), laminar  
931 cell distributions ( $n_{MC}^{PYR-L2}$ ,  $n_{MC}^{PYR-L3b}$ , ...), hypercolumnar size, etc. The model also abides by various  
932 electrophysiological constraints, such as plausible EPSP, IPSP sizes, estimates on laminar connection  
933 densities, characterization of cortical FF/FB pathways, estimates on axonal conductance speeds,  
934 dendritic arbor sizes (branching factors), commonly accepted synaptic time-constants for various  
935 receptor types, depression, adaptation, and builds on top of established models we adapted, such as  
936 the neuron model or the synaptic resource model. References to many of these constraints can be  
937 found throughout the Method Section.

938 Because our model is quite complex and synthesizes many different components and processes it is  
939 beyond the scope of this work to perform a detailed parameter sensitivity analysis. However, from  
940 our extensive simulations we conclude that it is robust and degrades gracefully. Almost all uncertain  
941 parameters can be varied  $\pm 30\%$  without breaking WM function. The model is dramatically  
942 subsampled and scaling up would be possible. This could be expected to further improve overall  
943 robustness. Highly related modular cortical network models have been studied extensively  
944 elsewhere (Lundqvist et al. 2010; Tully et al. 2013; Lundqvist et al. 2011; Fiebig & Lansner 2017; Tully  
945 et al. 2014), so here we prioritize novel aspects, namely the parameterization of corticocortical  
946 connectivity and spatial scale.

947 In the feedback pathway, a mere 0.6% connectivity is sufficient to support LTM activation in  
948 maintenance and recall. As rigorous testing (not shown here) revealed, lower connectivity degrades  
949 WM capacity, unless we increase the total number of co-active STM cells by other means. Forward  
950 connectivity can be even lower (0.015% in this model), because terminal clusters in STM are smaller  
951 and provide more information contrast (*Corticocortical Connectivity*). In both cases, our model uses  
952 these low density values, but they could be increased or decreased if single synaptic currents are  
953 reduced/increased respectively. Somewhat peculiarly, we also found that we needed to increase the  
954 corticocortical conductance of the backprojections ( $w_{FB}^{syn}$ ) by the same factor 1.8 (over the local  
955 conductance gain  $w_{gain}^{syn}$ ) as another detailed model account of macaque visual cortex (Schmidt et al.  
956 2015) to achieve functional WM at the stated long-distance connection probabilities.

957 There is an upper, but no lower limit on corticocortical distances in our model. When conduction  
958 delays exceed 65 ms (130 mm), STM feedback can no longer activate the LTM network, because  
959 bursts desynchronize before they arrive. On the other hand, STM and LTM could even be adjacent as  
960 we briefly mentioned at the end of the result section. Additionally, there is a minimum spatial scale  
961 to each component network. If we reduce the spatial extent (and thus the connection delays  
962 between HCs) by 45%, theta-like oscillations degrade and break at 20%, when the largest inter-HC  
963 delays fall below 5 ms. Spiking activity of activated memories collapses into a single brief burst  
964 (**Figure 3 – Supplement 2**, cf. **Figure 3D**), which degrades learning and effective information  
965 transmission both within and across networks. Networks may be much smaller however, if this is  
966 compensated by slower axonal conductance velocities ( $< 2$  mm/ms).

967 Supplementary Figures+legends

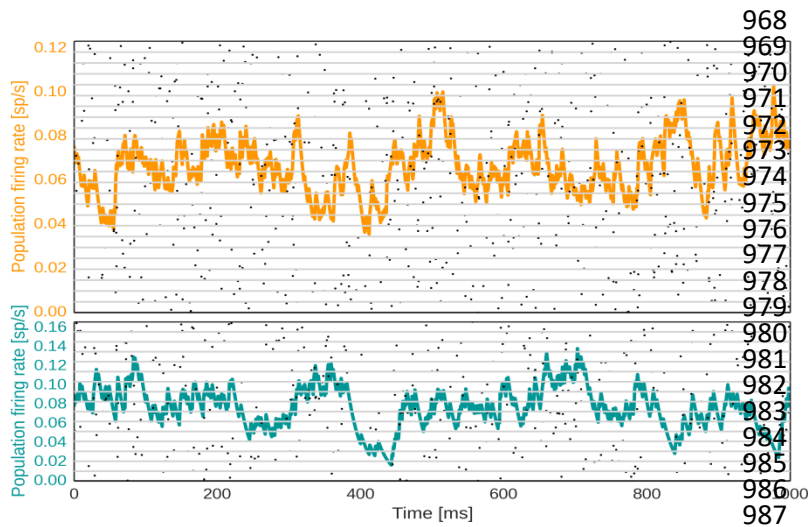

968  
969  
970  
971  
972  
973  
974  
975  
976  
977  
978  
979  
980  
981  
982  
983  
984  
985  
986  
987

**Figure 3 – Supplement 1. Basic Network behavior in spike rasters and population firing rates under low input.** The untrained networks STM (top) and LTM (bottom) feature low rate, asynchronous activity ( $CV2 = 0.7 \pm 0.2$ ). The underlying spike raster shows layer 2/3 activity in each HC (separated by grey horizontal lines) in the simulated network.

988  
989  
990

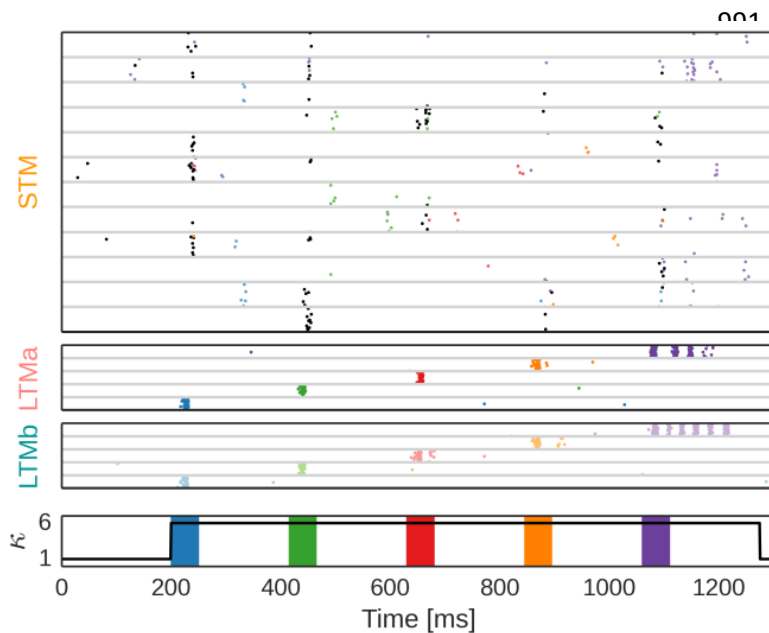

991  
992  
993  
994  
995  
996  
997  
998  
999  
1000

**Figure 3 – Supplement 2. Network activity during plasticity-modulated stimulation with 20% spatial extent.** Subsampled spike raster of the layer 2/3 population in a Hypercolumn of STM (top), and five coding minicolumns in LTMa (2<sup>nd</sup> row) and LTMb (3<sup>rd</sup> row) respectively during plasticity-modulated stimulation (i.e. encoding) of five paired LTM patterns. Without sufficient conduction delays, memory activations collapse into very brief bursts (with the exception of the last pattern here) and STM cannot effectively activate from or subsequently encode such brief activations (cf. **Figure 2D**, and **Supplementary Figure 6**).

1012  
1013

1014

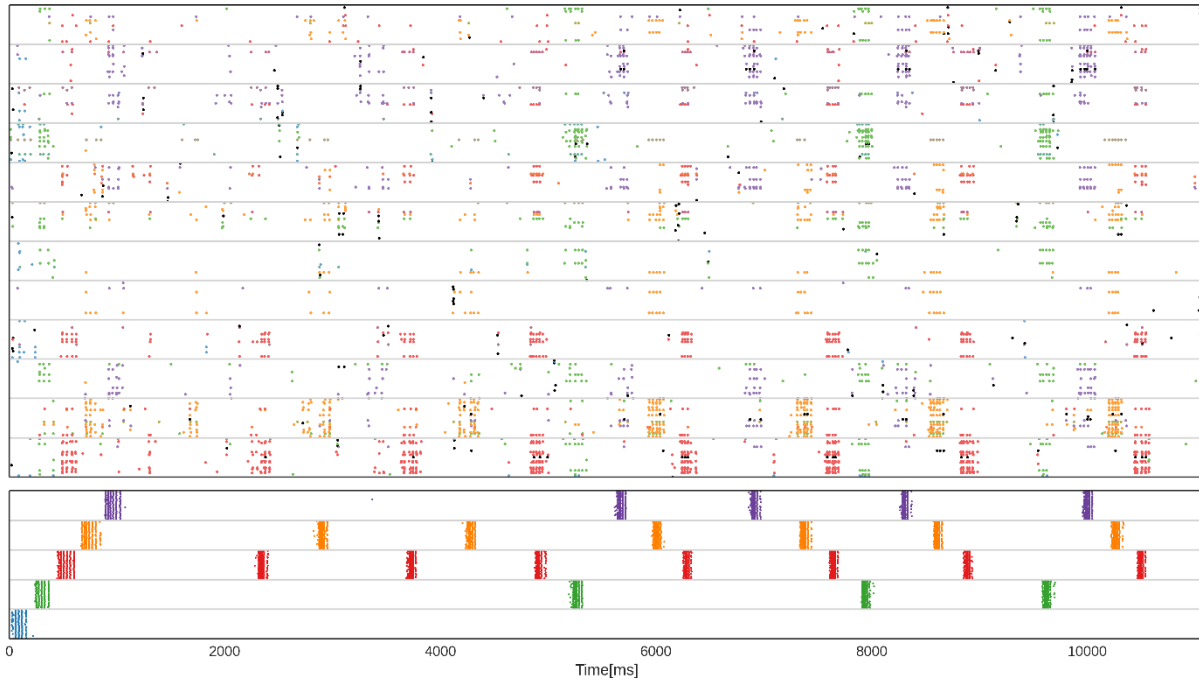

1015 **Figure 4 – Supplement 1. Encoding and feedback-driven reactivation of long-term memories.** Subsampled spike raster of STM (top) and  
1016 LTM (bottom) during encoding and subsequent maintenance of five memories (the first pattern is not maintained in this simulation).  
1017 During the initial plasticity-modulated stimulation phase, five LTM memories are cued via targeted 50 ms stimuli (shown underneath).  
1018 Plasticity of STM and its backprojections is modulated during this initial memory activation (cf. **Figure 3D**). Thereafter, a strong noise drive  
1019 to STM causes spontaneous activations and plasticity-induced consolidation of pattern-specific subpopulations in STM. Backprojections  
1020 reactivate associated LTM memories. **Top:** STM spike raster shows layer 2/3 activity in a single HC. MCs are separated by grey horizontal  
1021 lines. STM spikes are colored according to each cell's dominant LTM pattern-correlation, similar to Figure 2D. **Bottom:** LTM spike raster only  
1022 shows the activity of five coding MC in a single LTM HC, but indicates the activation of distributed LTM memory patterns. LTM spikes are  
1023 colored according to the pattern-specificity of each cell.  
1024  
1025

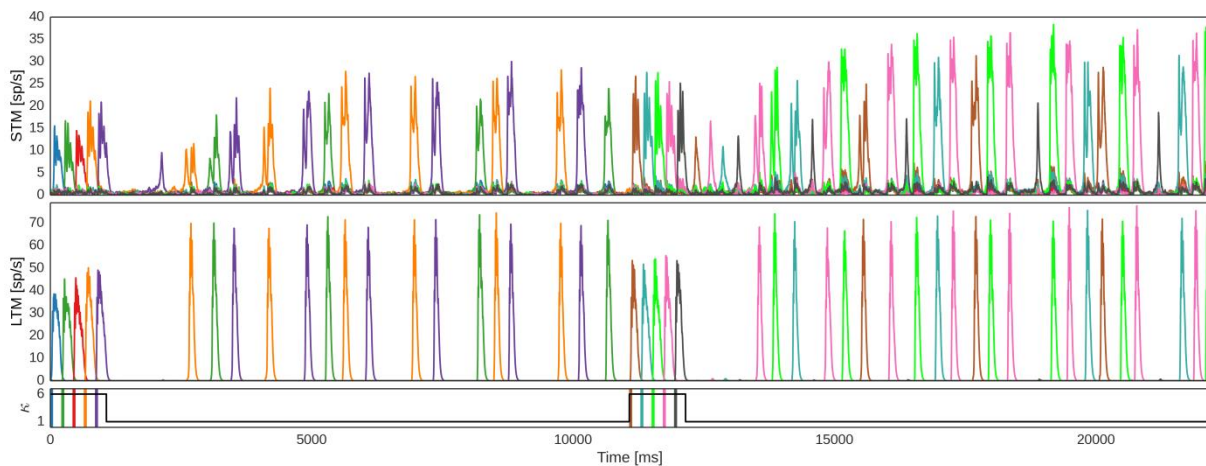

1026 **Figure 4 – Supplement 2. Spike rates during WM updating.** Population firing rates of pattern-specific subpopulations in STM and LTM  
1027 during encoding and subsequent maintenance of two sets of five LTM memories. After encoding and 10 s maintenance of the first set, WM  
1028 contents are overwritten with the second set of memories, maintained thereafter in spontaneous reactivation events. Bottom: Stimuli to  
1029 LTM and modulation of plasticity.  
1030

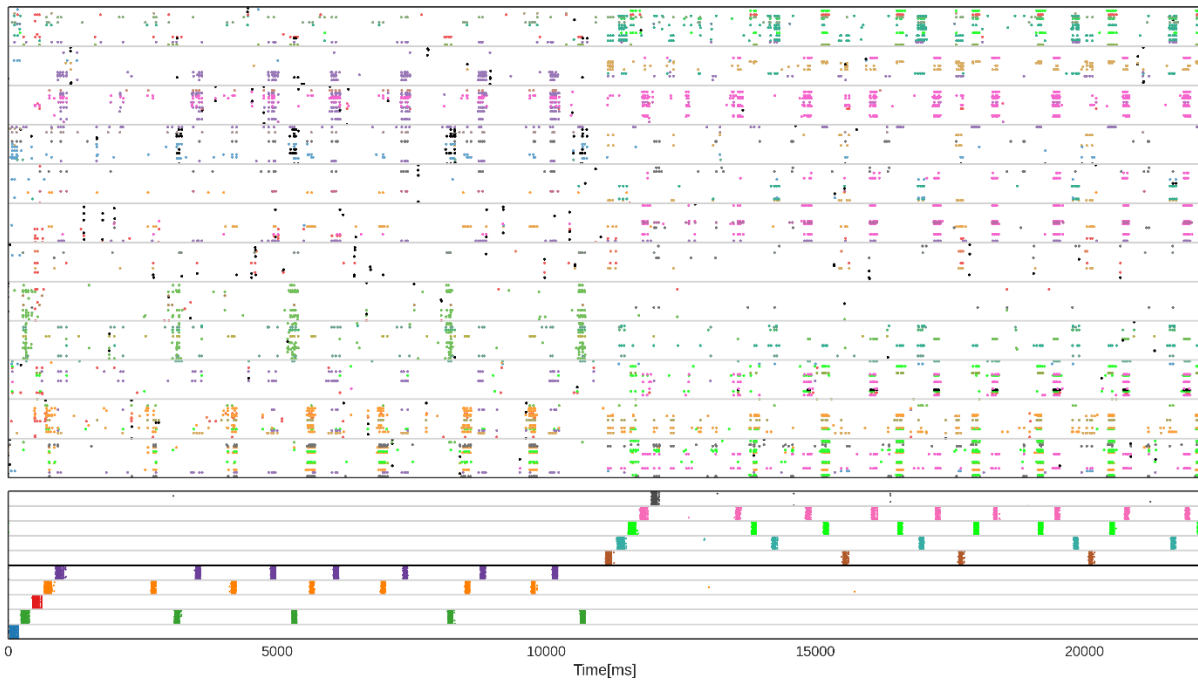

1031  
1032  
1033  
1034  
1035  
1036  
1037

**Figure 4 – Supplement 3. Spike raster during WM updating.** Subsampled spike raster of the layer 2/3 population in a Hypercolumn of STM (top) and LTM (bottom) respectively during encoding and subsequent maintenance of two sets of five LTM memories. STM spikes are colored according to each cells dominant pattern-selectivity. LTM spikes are colored according to the pattern-specificity of each cell. After encoding and 10 s maintenance of the first set, WM contents are overwritten with the second set of memories, maintained thereafter. Plasticity is temporarily boosted during the initial activation of LTM attractors (see preceding figure). Strong noise drive to STM causes spontaneous reactivations and consolidation of pattern-specific subpopulations in STM following each stimulation period.

1038

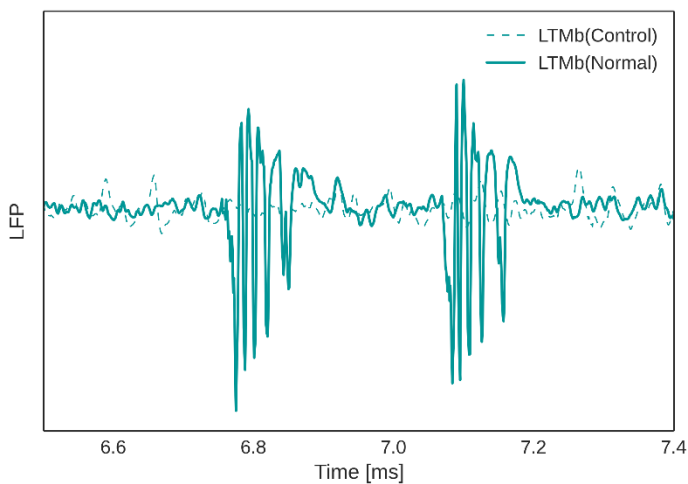

**Figure 7 – Supplement 1. Exemplary recording of the Local Field Potential (LFP) signal in LTMB following two cued activations of LTMA after learning and maintenance of associative LTMA-LTMB memory pairs (normal) or non-associative LTMA memories without concurrent LTMB activation (control).** While the LFP signal shows clear activation of associated LTMB items, LTMA specific cues do not elicit memory activations in LTMB in the control case.

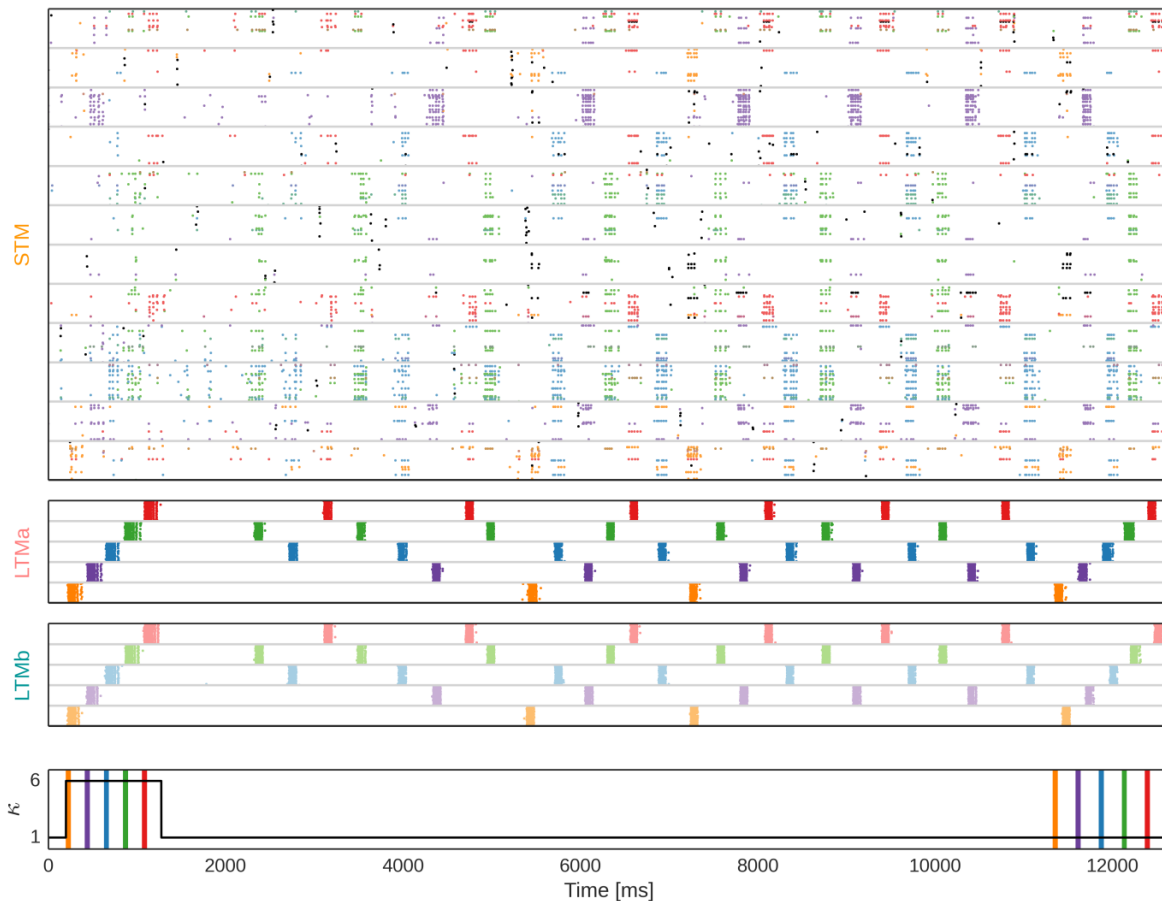

1051  
1052 **Figure 5 - Supplement 1. Spiking activity in the three networks, during the multi-modal LTM binding task.** Subsampled spike raster of the  
1053 layer 2/3 population in a Hypercolumn of STM (top), and five coding minicolumns in LTMa (2<sup>nd</sup> row) and LTMb (3<sup>rd</sup> row) respectively during  
1054 plasticity-modulated stimulation (i.e. encoding), subsequent maintenance, and associative cued recall of five paired LTM patterns  
1055 (orange,purple,blue,green,red). Minicolumns are separated by grey horizontal lines. STM spikes are colored according to each cells  
1056 dominant memory pair-selectivity. LTM Spikes are colored according to the memory pair-specificity of each cell in slightly shifted hues to  
1057 illustrate that LTMa and LTMb code for different, but associated memories. Bottom: Stimuli to LTM and modulation of plasticity. Note the  
1058 cued recall of all five memories at the end.

## 1059 References

- 1060 Anderson, K.L. et al., 2010. Theta oscillations mediate interaction between prefrontal cortex and medial temporal lobe in  
1061 human memory. *Cerebral Cortex*, 20(7), pp.1604–1612.
- 1062 Arnsten, A.F.T. & Jin, L.E., 2014. Molecular influences on working memory circuits in dorsolateral prefrontal cortex. *Progress*  
1063 *in Molecular Biology and Translational Science*, 122, pp.211–231.
- 1064 Baddeley, A., Gathercole, S. & Papagno, C., 1998. The Phonological Loop as a Language Learning Device. *Psychological*  
1065 *Review*, 105(1), pp.158–173.
- 1066 Brette, R. & Gerstner, W., 2005. Adaptive exponential integrate-and-fire model as an effective description of neuronal  
1067 activity. *Journal of neurophysiology*, 94(5), pp.3637–42.
- 1068 Burgess, N. & Hitch, G.J., 2006. A revised model of short-term memory and long-term learning of verbal sequences. *Journal*  
1069 *of Memory and Language*.
- 1070 Caminiti, R. et al., 2013. Diameter, Length, Speed, and Conduction Delay of Callosal Axons in Macaque Monkeys and  
1071 Humans: Comparing Data from Histology and Magnetic Resonance Imaging Diffusion Tractography. *Journal of*  
1072 *Neuroscience*, 33(36), pp.14501–14511.
- 1073 Camperi, M. & Wang, X.J., 1998. A model of visuospatial working memory in prefrontal cortex: Recurrent network and  
1074 cellular bistability. *Journal of Computational Neuroscience*, 5(4), pp.383–405.



- 1075 Canolty, R.T. & Knight, R.T., 2010. The functional role of cross-frequency coupling. *Trends in Cognitive Sciences*.
- 1076 Carter, G.C., 1987. Coherence and time delay estimation. *Proceedings of the IEEE*, 75(2), pp.236–255.
- 1077 Cer, D.M. & O'Reily, R.C., 2012. Neural mechanisms of binding in the hippocampus and neocortex: Insights from  
1078 computational models. In H. D. Zimmer, A. Mecklinger, & U. Lindenberger, eds. *Handbook of Binding and Memory:  
1079 Perspectives from Cognitive Neuroscience*. New York: Oxford University Press, USA, pp. 193–220.
- 1080 Chrysanthis, N., Fiebig, F. & Lansner, A., 2018. Introducing double bouquet cells into a modular cortical associative  
1081 memory model. *bioRxiv*, p.462010.
- 1082 Compte, A. et al., 2000. Synaptic Mechanisms and Network Dynamics Underlying Spatial Working Memory in a Cortical  
1083 Network Model. *Cerebral Cortex*, 10(9), pp.910–923.
- 1084 Crochet, S. & Petersen, C.C.H., 2009. Cortical Dynamics by Layers. *Neuron*, 64(3), pp.298–300.
- 1085 D'Esposito, M. & Postle, B.R., 2015. The Cognitive Neuroscience of Working Memory. *Annual Review of Psychology*, 66(1),  
1086 pp.115–142.
- 1087 DeFelipe, J. et al., 2006. Double-bouquet cells in the monkey and human cerebral cortex with special reference to areas 17  
1088 and 18. *Progress in Brain Research*, 154(SUPPL. A), pp.15–32.
- 1089 Doesburg, S.M. et al., 2008. Large-scale gamma-band phase synchronization and selective attention. *Cerebral Cortex*.
- 1090 Douglas, R.J. & Martin, K.A.C.C., 2004. Neuronal circuits of the neocortex. *Annual review of neuroscience*, 27(1), pp.419–51.
- 1091 Erickson, M.A., Maramba, L.A. & Lisman, J., 2010. A Single Brief Burst Induces GluR1-dependent Associative Short-term  
1092 Potentiation: A Potential Mechanism for Short-term Memory. *Journal of Cognitive Neuroscience*, 22(11), pp.2530–  
1093 2540.
- 1094 Eriksson, J. et al., 2015. Neurocognitive Architecture of Working Memory. *Neuron*, 88(1), pp.33–46.
- 1095 Fiebig, F. & Lansner, A., 2017. A Spiking Working Memory Model Based on Hebbian Short-Term Potentiation. *The Journal of  
1096 Neuroscience*, 37(1), pp.83–96.
- 1097 Fiebig, F. & Lansner, A., 2014. Memory consolidation from seconds to weeks: a three-stage neural network model with  
1098 autonomous reinstatement dynamics. *Frontiers in Computational Neuroscience*, 8, pp.1–17.
- 1099 Funahashi, S., Bruce, C.J. & Goldman-Rakic, P.S., 1989. Mnemonic coding of visual space in the monkey's dorsolateral  
1100 prefrontal cortex. *Journal of Neurophysiology*, 61(2), pp.331–349.
- 1101 Fuster, J.M., 2009. Cortex and Memory: Emergence of a New Paradigm. *Journal of Cognitive Neuroscience*, 21(11), pp.2047–  
1102 2072.
- 1103 Garnelo, M. & Shanahan, M., 2019. Reconciling deep learning with symbolic artificial intelligence: representing objects and  
1104 relations. *Current Opinion in Behavioral Sciences*.
- 1105 Gewaltig, M.-O. & Diesmann, M., 2007. NEST (NEural Simulation Tool). *Scholarpedia*, 2(4), p.1430.
- 1106 Girard, P., Hupe, J.M. & Bullier, J., 2001. Feedforward and feedback connections between areas V1 and V2 of the monkey  
1107 have similar rapid conduction velocities. *J Neurophysiol*, 85(3), p.1328–31.
- 1108 Goldman-Rakic, 1995. Cellular Basis of Working Memory Review. *Neuron*, 14, pp.477–485.
- 1109 Goto, Y., Yang, C.R. & Otani, S., 2010. Functional and Dysfunctional Synaptic Plasticity in Prefrontal Cortex: Roles in  
1110 Psychiatric Disorders. *Biological Psychiatry*, 67(3), pp.199–207.
- 1111 Herman, P.A., Lundqvist, M. & Lansner, A., 2013. Nested theta to gamma oscillations and precise spatiotemporal firing  
1112 during memory retrieval in a simulated attractor network. In *Brain Research*. pp. 68–87.
- 1113 Hirsch, J.A. & Martinez, L.M., 2006. Laminar processing in the visual cortical column. *Current Opinion in Neurobiology*.
- 1114 Hoffman, D.A. et al., 1997. K<sup>+</sup> channel regulation of signal propagation in dendrites of hippocampal pyramidal neurons. ,  
1115 387(6636), pp.869–875.

- 1116 Houzel, J.C., Milleret, C. & Innocenti, G., 1994. Morphology of callosal axons interconnecting areas 17 and 18 of the cat. *The*  
1117 *European journal of neuroscience*, 6(6), pp.898–917.
- 1118 Johnson, E.L. & Knight, R.T., 2015. Intracranial recordings and human memory. *Current Opinion in Neurobiology*, 31, pp.18–  
1119 25.
- 1120 Kapfer, C. et al., 2007. Supralinear increase of recurrent inhibition during sparse activity in the somatosensory cortex.  
1121 *Nature neuroscience*, 10(6), pp.743–53.
- 1122 Kauer, J.A. et al., 2018. Persistent but Labile Synaptic Plasticity at Excitatory Synapses. *The Journal of Neuroscience*.
- 1123 Lachaux, J.P. et al., 1999. Measuring phase synchrony in brain signals. *Human Brain Mapping*, 8(4), pp.194–208.
- 1124 Lansner, A., 2009. Associative memory models: from the cell-assembly theory to biophysically detailed cortex simulations.  
1125 *Trends in Neurosciences*, 32, pp.178–186.
- 1126 Lansner, A. et al., 2013. Reactivation in Working Memory: An Attractor Network Model of Free Recall D. Durstewitz, ed. *PloS*  
1127 *one*, 8(8), p.e73776.
- 1128 Legenstein, R. et al., 2016. Variable binding through assemblies in spiking neural networks. In *CEUR Workshop Proceedings*.
- 1129 Lindén, H., Pettersen, K.H. & Einevoll, G.T., 2010. Intrinsic dendritic filtering gives low-pass power spectra of local field  
1130 potentials. *Journal of Computational Neuroscience*, 29(3), pp.423–444.
- 1131 Logothetis, N.K., 2003. The underpinnings of the BOLD functional magnetic resonance imaging signal. *The Journal of*  
1132 *neuroscience : the official journal of the Society for Neuroscience*, 23(10), pp.3963–71.
- 1133 Lundqvist, M. et al., 2006. Attractor dynamics in a modular network model of neocortex. *Network: Computation in Neural*  
1134 *Systems*, 17(3), pp.253–276.
- 1135 Lundqvist, M., Compte, A. & Lansner, A., 2010. Bistable, irregular firing and population oscillations in a modular attractor  
1136 memory network. *PLoS Computational Biology*, 6, pp.1–12.
- 1137 Lundqvist, M., Herman, P. & Lansner, A., 2013. Effect of Prestimulus Alpha Power, Phase, and Synchronization on Stimulus  
1138 Detection Rates in a Biophysical Attractor Network Model. *Journal of Neuroscience*, 33(29), pp.11817–11824.
- 1139 Lundqvist, M., Herman, P. & Lansner, A., 2011. Theta and gamma power increases and alpha/beta power decreases with  
1140 memory load in an attractor network model. *Journal of cognitive neuroscience*, 23, pp.3008–3020.
- 1141 Markov, N.T. et al., 2014. Anatomy of hierarchy: Feedforward and feedback pathways in macaque visual cortex. *Journal of*  
1142 *Comparative Neurology*, 522(1), pp.225–259.
- 1143 Mi, Y., Katkov, M. & Tsodyks, M., 2017. Synaptic Correlates of Working Memory Capacity. *Neuron*, 93(2), pp.323–330.
- 1144 Miyashita, Y., 1993. Inferior Temporal Cortex: Where Visual Perception Meets Memory. *Annual Review of Neuroscience*,  
1145 16(1), pp.245–263.
- 1146 Mongillo, G., Barak, O. & Tsodyks, M., 2008. Synaptic theory of working memory. *Science (New York, N.Y.)*, 319, pp.1543–  
1147 1546.
- 1148 Mountcastle, V.B., 1997. The columnar organization of the cerebral cortex. *Brain*, 120, pp.701–722.
- 1149 O'Reilly, R.C. & Frank, M.J., 2006. Making working memory work: A computational model of learning in the prefrontal cortex  
1150 and basal ganglia. *Neural Computation*.
- 1151 Okun, M., Naim, A. & Lampl, I., 2010. The Subthreshold Relation between Cortical Local Field Potential and Neuronal Firing  
1152 Unveiled by Intracellular Recordings in Awake Rats. *Journal of Neuroscience*, 30(12), pp.4440–4448.
- 1153 Palva, J.M. et al., 2010. Neuronal synchrony reveals working memory networks and predicts individual memory capacity.  
1154 *Proceedings of the National Academy of Sciences*.
- 1155 Palva, J.M., 2005. Phase Synchrony among Neuronal Oscillations in the Human Cortex. *Journal of Neuroscience*, 25(15),  
1156 pp.3962–3972.
- 1157 Parisien, C., Anderson, C.H. & Eliasmith, C., 2008. Solving the Problem of Negative Synaptic Weights in Cortical Models.

- 1158 *Neural Computation*, 20(6), pp.1473–1494.
- 1159 Park, P. et al., 2014. NMDA receptor-dependent long-term potentiation comprises a family of temporally overlapping forms  
1160 of synaptic plasticity that are induced by different patterns of stimulation. *Philosophical transactions of the Royal*  
1161 *Society of London. Series B, Biological sciences*, 369(1633), p.20130131.
- 1162 Petersson, M.E., Yoshida, M. & Fransén, E.A., 2011. Low-frequency summation of synaptically activated transient receptor  
1163 potential channel-mediated depolarizations. *The European journal of neuroscience*, 34(4), pp.578–93.
- 1164 Petrides, M. & Pandya, D.N., 1999. Dorsolateral prefrontal cortex: comparative cytoarchitectonic analysis in the human and  
1165 the macaque brain and corticocortical connection patterns. *European Journal of Neuroscience*, 11(3), pp.1011–1036.
- 1166 Pinkas, G., Lima, P. & Cohen, S., 2012. A dynamic binding mechanism for retrieving and unifying complex predicate-logic  
1167 knowledge. In *Lecture Notes in Computer Science (including subseries Lecture Notes in Artificial Intelligence and*  
1168 *Lecture Notes in Bioinformatics)*. pp. 482–490.
- 1169 Pinkas, G., Lima, P. & Cohen, S., 2013. Representing, binding, retrieving and unifying relational knowledge using pools of  
1170 neural binders. In *Biologically Inspired Cognitive Architectures*. Elsevier B.V., pp. 87–95.
- 1171 Potjans, T.C. & Diesmann, M., 2014. The cell-type specific cortical microcircuit: Relating structure and activity in a full-scale  
1172 spiking network model. *Cerebral Cortex*, 24(3), pp.785–806.
- 1173 Ren, M. et al., 2007. Specialized inhibitory synaptic actions between nearby neocortical pyramidal neurons. *Science (New*  
1174 *York, N.Y.)*, 316(5825), pp.758–61.
- 1175 Reynolds, J.H. & Desimone, R., 1999. The role of neural mechanisms of attention in solving the binding problem. *Neuron*,  
1176 24(1), pp.19–29.
- 1177 Sakata, S. & Harris, K.D., 2009. Laminar Structure of Spontaneous and Sensory-Evoked Population Activity in Auditory  
1178 Cortex. *Neuron*, 64(3), pp.404–418.
- 1179 Sandberg, A. et al., 2002. A Bayesian attractor network with incremental learning. *Network*, 13, pp.179–194.
- 1180 Sauseng, P. et al., 2004. Theta coupling in the human electroencephalogram during a working memory task. *Neuroscience*  
1181 *Letters*.
- 1182 Schmidt, M. et al., 2015. Full-density multi-scale account of structure and dynamics of macaque visual cortex.
- 1183 Silberberg, G. & Markram, H., 2007. Disynaptic inhibition between neocortical pyramidal cells mediated by Martinotti cells.  
1184 *Neuron*, 53(5), pp.735–46.
- 1185 Silverstein, D.N. & Lansner, A., 2011. Is Attentional Blink a Byproduct of Neocortical Attractors? *Frontiers in Computational*  
1186 *Neuroscience*, 5.
- 1187 Slepian, D., 1978. Prolate Spheroidal Wave Functions, Fourier Analysis, and Uncertainty—V: The Discrete Case. *Bell System*  
1188 *Technical Journal*, 57(5), pp.1371–1430.
- 1189 Slifstein, M. et al., 2015. Deficits in prefrontal cortical and extrastriatal dopamine release in schizophrenia a positron  
1190 emission tomographic functional magnetic resonance imaging study. *JAMA Psychiatry*, 72(4), pp.316–324.
- 1191 Squire, 1992. Memory and the hippocampus: a synthesis from findings with rats, monkeys, and humans. *Psychological*  
1192 *review*, 99, pp.195–231.
- 1193 Tallon-Baudry, C. et al., 1998. Induced gamma -Band Activity during the Delay of a Visual Short-Term Memory Task in  
1194 Humans. *J. Neurosci.*, 18(11), pp.4244–4254.
- 1195 Tallon-Baudry, C. & Bertrand, O., 1999. Oscillatory gamma activity in humans and its role in object representation. *Trends in*  
1196 *Cognitive Sciences*, 3(4), pp.151–162.
- 1197 Teyler & DiScenna, 1986. The hippocampal memory indexing theory. *Behavioral neuroscience*, 100(2), pp.147–154.
- 1198 Teyler, T.J. & Rudy, J.W., 2007. The hippocampal indexing theory and episodic memory: Updating the index. *Hippocampus*,  
1199 17(12), pp.1158–1169.
- 1200 Thomson, A.M., 2002. Synaptic Connections and Small Circuits Involving Excitatory and Inhibitory Neurons in Layers 2-5 of

- 1201 Adult Rat and Cat Neocortex: Triple Intracellular Recordings and Biocytin Labelling In Vitro. *Cerebral Cortex*, 12(9),  
1202 pp.936–953.
- 1203 Thomson, D.J., 1982. Spectrum Estimation and Harmonic Analysis. *Proceedings of the IEEE*, 70(9), pp.1055–1096.
- 1204 Thorpe, S.J. & Fabre-Thorpe, M., 2001. Seeking categories in the brain. *Science*, 291(5502), pp.260–263.
- 1205 Tomita, H. et al., 1999. Top-down signal from prefrontal cortex in executive control of memory retrieval. *Nature*, 401(6754),  
1206 pp.699–703.
- 1207 Tsodyks, M. V. & Markram, H., 1997. The neural code between neocortical pyramidal neurons depends on neurotransmitter  
1208 release probability. *Proceedings of the National Academy of Sciences*, 94(2), pp.719–723.
- 1209 Tucker, T.R., 2002. Recruitment of Local Inhibitory Networks by Horizontal Connections in Layer 2/3 of Ferret Visual Cortex.  
1210 *Journal of Neurophysiology*, 89(1), pp.501–512.
- 1211 Tully, P.J. et al., 2013. Probabilistic computation underlying sequence learning in a spiking attractor memory network. *BMC*  
1212 *Neuroscience*, 14(Suppl 1), p.P236.
- 1213 Tully, P.J. et al., 2016. Spike-Based Bayesian-Hebbian Learning of Temporal Sequences. *PLoS computational biology*, 12(5),  
1214 p.e1004954.
- 1215 Tully, P.J., Hennig, M.H. & Lansner, A., 2014. Synaptic and nonsynaptic plasticity approximating probabilistic inference.  
1216 *Frontiers in Synaptic Neuroscience*, 6(APR).
- 1217 Ursino, M. & La Cara, G.E., 2006. Travelling waves and EEG patterns during epileptic seizure: Analysis with an integrate-and-  
1218 fire neural network. *Journal of Theoretical Biology*, 242(1), pp.171–187.
- 1219 van der Velde, F. & de Kamps, M., 2015. The necessity of connection structures in neural models of variable binding.  
1220 *Cognitive Neurodynamics*, 9(4), pp.359–370.
- 1221 Voges, N. et al., 2010. Models of cortical networks with long-range patchy projections. *Journal of Computational*  
1222 *Neuroscience*.
- 1223 Volianskis, A. et al., 2015. Long-term potentiation and the role of N-methyl-D-aspartate receptors. *Brain Research*, 1621,  
1224 pp.5–16.
- 1225 Volianskis, A. & Jensen, M.S., 2003. Transient and sustained types of long-term potentiation in the CA1 area of the rat  
1226 hippocampus. *The Journal of physiology*, 550(Pt 2), pp.459–92.
- 1227 Wahlgren, N. & Lansner, A., 2001. Biological evaluation of a Hebbian-Bayesian learning rule. *Neurocomputing*, 38–40,  
1228 pp.433–438.
- 1229 Wickens, J.R., 2009. Synaptic plasticity in the basal ganglia. *Behavioural Brain Research*, 199(1), pp.119–128.
- 1230 Yoshimura, Y. & Callaway, E.M., 2005. Fine-scale specificity of cortical networks depends on inhibitory cell type and  
1231 connectivity. *Nature Neuroscience*, 8(11), pp.1552–1559.
- 1232 Yoshimura, Y., Dantzker, J.L.M. & Callaway, E.M., 2005. Excitatory cortical neurons form fine-scale functional networks.  
1233 *Nature*, 433(7028), pp.868–873.
- 1234 Zimmer, H.D., Mecklinger, A. & Lindenberger, U., 2012. *Handbook of Binding and Memory: Perspectives from Cognitive*  
1235 *Neuroscience*, Oxford: Oxford University Press.
- 1236 Zimmer, H.D., Mecklinger, A. & Lindenberger, U., 2006. Levels of binding: types, mechanisms, and functions of binding in  
1237 remembering. In *Handbook of binding and memory: Perspectives from cognitive neuroscience*. Oxford University  
1238 Press, pp. 3–22.
- 1239 Zmigrod, S., Colzato, L.S. & Hommel, B., 2014. Evidence for a role of the right dorsolateral prefrontal cortex in controlling  
1240 stimulus-response integration: a transcranial direct current stimulation (tDCS) study. *Brain Stimul*, 7(4), pp.516–520.
- 1241 Zufferey, P.D. et al., 1999. The role of pattern vision in the development of cortico-cortical connections. *European Journal of*  
1242 *Neuroscience*, 11(8), pp.2669–2688.
- 1243
